# Clairvoyante: a multi-task convolutional deep neural network for variant calling in Single Molecule Sequencing

## Author

Ruibang Luo<sup>1,2,\*</sup>, Fritz J. Sedlazeck<sup>3</sup>, Tak-Wah Lam<sup>1</sup>, Michael C. Schatz<sup>2</sup>

<sup>1</sup> Department of Computer Science, The University of Hong Kong, Hong Kong

<sup>2</sup> Department of Computer Science, Johns Hopkins University, Baltimore, MD, USA

<sup>3</sup> Human Genome Sequencing Center, Baylor College of Medicine, Houston, TX, USA

\* Correspondence should be addressed to [rbluo@cs.hku.hk](mailto:rbluo@cs.hku.hk)

## Abstract

The accurate identification of DNA sequence variants is an important, but challenging task in genomics. It is particularly difficult for single molecule sequencing, which has a per-nucleotide error rate of ~5%-15%. Meeting this demand, we developed Clairvoyante, a multi-task five-layer convolutional neural network model for predicting variant type (SNP or indel), zygosity, alternative allele and indel length from aligned reads. For the well-characterized NA12878 human sample, Clairvoyante achieved 99.73%, 97.68% and 95.36% precision on known variants, and 98.65%, 92.57%, 87.26% F1-score for whole-genome analysis, using Illumina, PacBio, and Oxford Nanopore data, respectively. Training on a second human sample shows Clairvoyante is sample agnostic and finds variants in less than two hours on a standard server. Furthermore, we identified 3,135 variants that are missed using Illumina but supported independently by both PacBio and Oxford Nanopore reads. Clairvoyante is available open-source (<https://github.com/aquaskyline/Clairvoyante>), with modules to train, utilize and visualize the model.

## Introduction

A fundamental problem in genomics is to find the nucleotide differences in an individual genome relative to a reference sequence, i.e., variant calling. It is essential to accurately and efficiently call variants so that the genomic variants that underlie phenotypic differences and disease can be correctly detected<sup>1</sup>. Previous works have intensively studied the different data characteristics that might contribute to higher variant calling performance including the properties of the sequencing instrument<sup>2</sup>, the quality of preceding sequence aligners<sup>3</sup> and the alignability of genome reference<sup>4</sup>. Today, these characteristics are carefully considered by state-of-the-art variant calling pipelines to optimize performance<sup>5,6</sup>. However, most of these analyses were done for short read sequencing, especially the Illumina technology, and require further study for other sequencing platforms.

42 Single Molecule Sequencing (SMS) technologies are emerging in recent years for a variety of  
43 important applications<sup>7</sup>. These technologies generate sequencing reads two orders of  
44 magnitude longer than standard short-read Illumina sequencing (10kbp to 100kbp instead of  
45 ~100bp), but they also contain 5%-15% sequencing errors rather than ~1% for Illumina. The  
46 two major SMS companies, Pacific Biosciences (PacBio) and Oxford Nanopore Technology  
47 (ONT) have greatly improved the performance of certain genomic applications, especially  
48 genome assembly and structural variant detection<sup>7</sup>. However, single nucleotide and small  
49 indel variant calling with SMS remain challenging because the traditional variant caller  
50 algorithms fail to handle such a high sequencing error rate, especially one enriched for indel  
51 errors.

52  
53 Artificial Neural Networks (ANNs) are becoming increasingly prominent for a variety of  
54 classification and analysis tasks due to their advances in speed and applicability in many  
55 fields. One of the most important applications of ANNs has been image classification, with  
56 many successes including MNIST<sup>8</sup> or GoogLeNet<sup>9</sup>. The recent DeepVariant<sup>10</sup> package  
57 repurposed the Inception convolutional neural network for DNA variant detection by  
58 applying it to analyzing images of aligned reads around candidate variants. At each candidate  
59 site, the network computes the probabilities of three possible zygositys (homozygous  
60 reference, heterozygous reference, and homozygous alternative), allowing accurate  
61 determination of the presence or absence of a candidate variant. And then, DeepVariant uses  
62 a post-processing step to restore the other variant information including the exact alternative  
63 allele and variant type. As the authors pointed out originally in their manuscript, it might be  
64 sub-optimal to use an image classifier for variant calling, as valuable information that could  
65 contribute to higher accuracy are lost during the image transformation. In the latest version of  
66 DeepVariant, the code is built on top of the Tensorflow machine learning framework,  
67 allowing users to change the image input into any other formats by rewriting a small part of  
68 the code. However, whether it is reasonable or not to use a network (namely inception-v3)  
69 specifically designed for image-related tasks to call variants remains unclear.

70  
71 In this study, we present Clairvoyante, a multi-task convolutional deep neural network  
72 specifically designed for variant calling with SMS reads. We explored different ways to  
73 enhance Clairvoyante's power to extract valuable genomic features from the frequent  
74 background errors present in SMS. Experiments calling variants in multiple human genomes  
75 both at known variant sites and genome-wide show that Clairvoyante is on-par with GATK  
76 UnifiedGenotyper on Illumina data, and substantially outperforms Nanopolish and  
77 DeepVariant on PacBio and ONT data on accuracy and speed.

## 78 79 **Methods**

80 In this section, we first introduce the DNA sequencing datasets of three different sequencing  
81 technologies: Illumina, PacBio, and ONT. We then formulate variant calling as a supervised  
82 machine learning problem. Finally, we present Clairvoyante for this problem and explain the  
83 essential deep learning techniques applied in Clairvoyante.

## 84 85 **Datasets**

86 While most of the variant calling in previous studies were done using a single computational  
87 algorithm on single sequencing technology, the Genome-in-a-Bottle (GIAB) dataset<sup>11</sup> first  
88 published in 2014 has been an enabler of our work. The dataset provides high-confidence  
89 SNPs and indels for a standard reference sample HG001 (also referred to as NA12878) by

90 integrating and arbitrating between 14 datasets from five sequencing and genotyping  
91 technologies, seven read mappers and three variant callers. For our study, we used as our  
92 truth dataset the latest dataset version 3.3.2 for HG001 (**Supplementary Material, Data**  
93 **Source, Truth Variants**) that comprises 3,042,789 SNPs, 241,176 insertions and 247,178  
94 deletions for the GRCh38 reference genome, along with 3,209,315 SNPs, 225,097 insertions  
95 and 245,552 deletions for GRCh37. The dataset also provides a list of regions that cover  
96 83.8% and 90.8% of the GRCh38 and the GRCh37 reference genome, where variants were  
97 confidently genotyped. The GIAB extensive project<sup>12</sup> published in 2016 further introduced  
98 four standard samples, including the Ashkenazim Jewish sample HG002 we have used in this  
99 work, containing 3,077,510 SNPs, 249,492 insertions and 256,137 deletions for GRCh37,  
100 3,098,941 SNPs, 239,707 insertions and 257,019 deletions for GRCh37. 83.2% of the whole  
101 genome was marked as confident for both the GRCh38 and GRCh37.  
102

### 103 Illumina Data

104 The Illumina data was produced by the National Institute of Standards and Technology  
105 (NIST) and Illumina<sup>12</sup>. Both the HG001 and HG002 datasets were generated on an Illumina  
106 HiSeq 2500 in Rapid Mode (v1) with 2x148bp paired-end reads. Both have an approximate  
107 300x total coverage and were aligned to GRCh38 decoy version 1 using Novoalign version  
108 3.02.07. In our study, we further down-sampled the two datasets to 50x to match the available  
109 data coverage of the other two SMS technologies (**Supplementary Material, Data Source,**  
110 **Illumina Data**).  
111

### 112 Pacific Bioscience (PacBio) Data

113 The PacBio data was produced by NIST and Mt. Sinai School of Medicine<sup>12</sup>. The HG001  
114 dataset has 44x coverage, and the HG002 has 69x. Both datasets comprise 90% P6-C4 and  
115 10% P5-C3 sequencing chemistry and have a sequence N50 length between 10k-11kbp.  
116 Reads were extracted from the downloaded alignments and aligned again to GRCh37 decoy  
117 version 5 using NGMLR<sup>13</sup> version 0.2.3 (**Supplementary Material, Data Source, PacBio**  
118 **Data**).  
119

### 120 Oxford Nanopore (ONT) Data

121 The Oxford Nanopore data were generated by the Nanopore WGS consortium<sup>14</sup>. Only data  
122 for sample HG001 are available to date, thus limiting the “cross sample variant calling  
123 evaluation” and “combined sampled training” on ONT data in the Result section. In our  
124 study, we used the ‘rel3’ release sequenced on the Oxford Nanopore MinION using 1D  
125 ligation kits (450bp/s) and R9.4 chemistry. The release comprises 39 flowcells and 91.2G  
126 bases, about 30x coverage. The reads were downloaded in raw fastq formatted and aligned to  
127 GRCh37 decoy version 5 using NGMLR<sup>13</sup> version 0.2.3 (**Supplementary Material, Data**  
128 **Source, Oxford Nanopore Data**).  
129

## 130 Variant Calling as Multi-Task Regression and Classification

131 We model each variant with four categorical variables:

- 132 •  $A \in \{A, C, G, T\}$  is the alternate base at a SNP, or the reference base otherwise
- 133 •  $Z \in \{\text{Homozygote}, \text{Heterozygote}\}$  is the zygosity of the variant
- 134 •  $T \in \{\text{Reference}, \text{SNP}, \text{Insertion}, \text{Deletion}\}$  is the variant type
- 135 •  $L \in \{0, 1, 2, 3, 4, >4\}$  is the length of an INDEL, where ‘>4’ represents a gap longer  
136 than 4bp  
137

138 For the truth data, each variable can be represented by a vector (i.e. 1-D tensor) using the  
139 one-hot or probability encoding, as is typically done in deep learning:  $a_b = \Pr\{A = b\}$ ,  $z_i = \delta(i,$   
140  $Z)$ ,  $t_j = \delta(j, T)$  and  $l_k = \delta(k, L)$ , where  $\delta(p, q)$  equals 1 if  $p = q$ , or 0 otherwise. The four vectors  
141  $(a, z, t, l)$  are the outputs of the network.  $a_b$  is set to all zero for an insertion or deletion. In the  
142 current Clairvoyante implementation, 1) multi-allelic SNPs are excluded from training, and  
143 2) base-quality is not used (see “Discussion” below for a rationale).  
144

145 With deep learning, we seek a function  $F: x \rightarrow (a, z, t, l)$  that minimizes the cost  $C$ :

$$150 \quad C = \frac{1}{N} \sum_v \left( \sum_{b=1}^4 (\hat{a}_b^{(v)} - a_b^{(v)})^2 - \sum_{i=1}^2 z_i^{(v)} \log \hat{z}_i^{(v)} - \sum_{j=1}^4 t_j^{(v)} \log \hat{t}_j^{(v)} - \sum_{k=1}^6 l_k^{(v)} \log \hat{l}_k^{(v)} \right)$$

146 where  $v$  iterates through all variants and a variable with a caret indicates it is an estimate from  
147 the network. Variable  $x$  is the input of the network, and it can be of any shape and contain  
148 any information. Clairvoyante uses an  $x$  that contains a summarized “piled-up” representation  
149 of read alignments. The details will be discussed in the next section named “Clairvoyante”.  
151

152 In our study, good performance implies correct predictions could be made even when the  
153 evidence is marginal to distinguish a genuine variant from non-variant (reference) position.  
154 To achieve the goal, we paired each truth variant with two non-variants randomly sampled  
155 from the genome at all possible non-variant and non-ambiguous sites for model training.  
156 With about 3.5M truth variants from the GIAB dataset, about 7M non-variants are added as  
157 samples for model training.  
158

159 We randomly partitioned all samples into 90% for training and 10% for validation. We  
160 intentionally did not hold out any sample of the data for testing as other projects commonly  
161 do because, in our study, we can use an entirely different dataset for testing samples. For  
162 example, we can use the samples of HG002 to test against a model trained on HG001, and  
163 vice versa.  
164

## 165 Clairvoyante

166 Clairvoyante is a multi-task five-layer convolution neural network with the last two layers as  
167 feedforward layers (**Figure 1**). The multi-task neural network makes four groups of  
168 predictions on each input: 1) alternative alleles, 2) zygosity, 3) variant type, and 4) indel  
169 length. The predictions in groups 2, 3 and 4 are mutually exclusive while the predictions in  
170 group 1 are not. The alternative allele predictions are computed directly from the first fully  
171 connected layer (FC4), while the other three group of predictions are computed from the  
172 second fully connected layer (FC5). The indel length prediction group has six possible  
173 outputs indicating an indel with a length between 0-3bp or  $\geq 4$ bp of any unbounded length.  
174 The prediction limit on indel length is configurable in Clairvoyante and can be raised when  
175 more training data on longer indels could be provided. The Clairvoyante network is succinct  
176 and fine-tuned for the variant calling purpose. It contains only 1,631,496 parameters, about  
177 13-times fewer than DeepVariant<sup>10</sup> using the Inception-v3 network architecture, which was  
178 originally designed for general purpose image recognition. Additional details of Clairvoyante  
179 are introduced in the different subsections below.  
180

181 For each input sample (truth or candidate variants), the overlapping sequencing read  
182 alignments are transformed into a multi-dimensional tensor  $x$  of shape 33 by 4 by 4. The first  
183 dimension ‘33’ corresponds to the position. The second dimension ‘4’ corresponds to the  
184 count of A, C, G, or T on the sequencing reads, the way of counting is subject to the third

185 dimension. The third dimension ‘4’ corresponds to four different ways of counting. In the  
 186 first dimension, we added 16 flanking base-pairs on both sides of a candidate (in total 33bp),  
 187 which we have measured to be sufficient to manifest background noise while providing a  
 188 good computational efficiency. In the second dimension, we separated any counts into four  
 189 bases. In the third dimension, we used four different ways of counting, generating four  
 190 tensors of shape 33 by 4. The first tensor encodes the reference sequence and the number of  
 191 reads supporting the reference alleles. The second, third and fourth tensors use the relative  
 192 count against the first tensor: the second tensor encodes the inserted sequences, the third  
 193 tensor encodes the deleted base-pairs, and the fourth tensor encodes alternative alleles. For an  
 194 exact description of how  $x$  is generated, please refer to the pseudo code in “**Supplementary**  
 195 **Material, Pseudo code for generating the input**”. **Figure 2** illustrates how the tensors can  
 196 represent a SNP, an insertion, a deletion, and a non-variant (reference), respectively. The  
 197 non-variant in **Figure 2** also depicts how the matrix will show background noise. A similar  
 198 but simpler read alignment representation was proposed by Jason Chin<sup>15</sup> in mid-2017, the  
 199 same time as we started developing Clairvoyante. Different from Chin’s representation, ours  
 200 decouples the substitution and insertion signal into separate arrays and allows us to precisely  
 201 record the allele of inserted sequence.

202

203 Our study used the widely adopted TensorFlow<sup>16</sup> as its primary programming framework.  
 204 Using the 44x coverage HG001 PacBio dataset as an example, a near optimal model can be  
 205 trained in three hours using the latest desktop GPU model nVidia GTX 1080 Ti. Using a  
 206 trained model, about two hours is needed to call variants genome-wide using a 2 x 14-core  
 207 CPU-only server (without GPU), and it takes only a few minutes to call variants at known  
 208 variant sites or in an exome (>5,000 candidate sites per second). Several techniques have  
 209 been applied to minimize computational and memory consumption (see the **Computational**  
 210 **Performance** subsection).

211

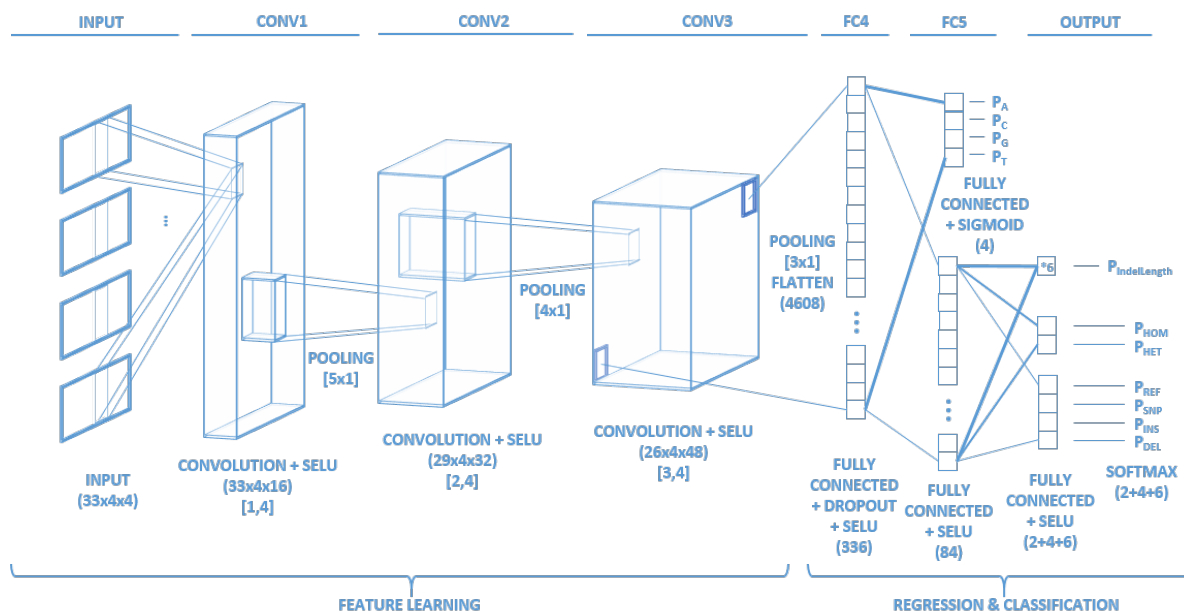

212

213 **Figure 1.** Clairvoyante network architecture and layer details. The descriptions under each  
 214 layer includes 1) the layer’s function; 2) the activation function used; 3) the dimension of the  
 215 layer in parenthesis (Input layer: Height x Width x Arrays, Convolution layer: Height x  
 216 Width x Filters, Fully connected layer: Nodes), and; 4) kernel size in brackets (Height x  
 217 Width).

218

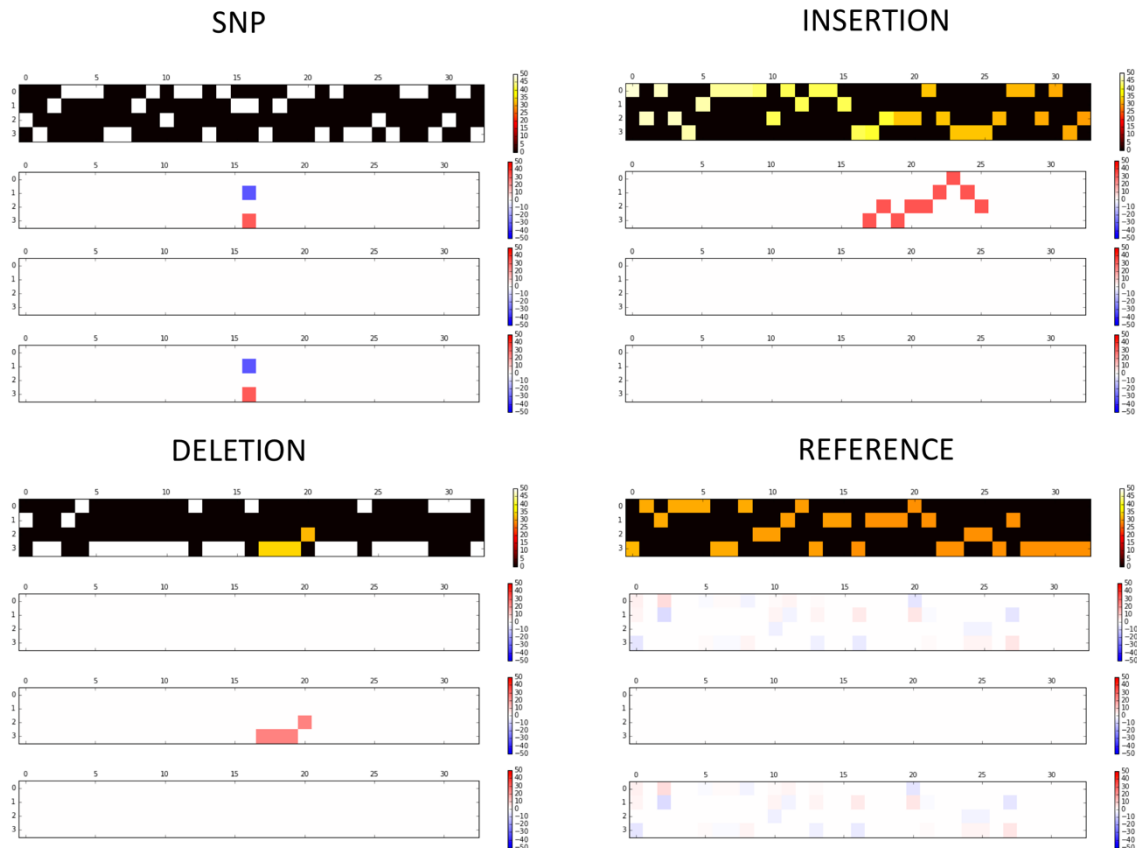

219  
220 **Figure 2.** Selected illustrations of how Clairvoyante represents the three common types of  
221 small variant, and a non-variant. The figure includes: (**top left**) a C>G SNP, (**top right**) a 9bp  
222 insertion, (**bottom left**) a 4bp deletion, and (**bottom right**) a non-variant with reference  
223 allele. The color intensity represents the strength of a certain variant signal. The SNP,  
224 insertion and deletion examples are ideal with almost zero background noise. The non-variant  
225 example illustrates how the background noises look like when not mingled with any variant  
226 signal.  
227

## 228 Model Initialization

229 Weight initialization is important to stabilize the variances of activation and back-propagated  
230 gradients at the beginning of model training. We used a He initializer<sup>17</sup> to initialize the  
231 weights of hidden layers in Clairvoyante, as the He initializer is optimized for training  
232 extremely deep models using rectified activation function directly from scratch. For each  
233 layer, the weight of each node is sampled from a univariate normal distribution with  $\sigma = 1 \div$   
234  $\sqrt{d_i} \div 2$ , where  $d_i$  denote the number of in-degree of the node.  
235

## 236 Activation Function

237 Batch normalization is a technique to ensure zero mean and unit variance in each hidden  
238 layer to avoid exploding or diminishing gradients during training. However, batch  
239 normalization has often been identified as a computational bottleneck in neural network  
240 training because computing the mean and the standard deviation of a layer is not only a  
241 dependent step, but also a reduction step that cannot be efficiently parallelized. To tackle this  
242 problem, we will use the new activation function called “Scaled Exponential Linear Units”  
243 (SELUs)<sup>18</sup>, a variant of the rectified activation function. Different from a standard batch

244 normalization approach that adds an implicit layer for the named purpose after each hidden  
245 layer, SELUs utilizes the Banach fixed-point theorem to ensure convergence to zero mean  
246 and unit variance in each hidden layer without batch normalization.  
247

## 248 Optimizer and Learning rate

249 We used an Adam optimizer with default settings<sup>19</sup> to update the weights by adaptive node-  
250 specific learning rates, whereas setting a global learning rate only functions as setting an  
251 upper limit to the learning rates. This behavior allows Clairvoyante to remain at a higher  
252 learning rate for a longer time to speed up the training process.  
253

254 Although the Adam optimizer performs learning rate decay intrinsically, we found decreasing  
255 the global learning rate when the cost of the model in training plateaued can lead to a better  
256 model performance in our study. In Clairvoyante, we implemented two types of training  
257 modes. The fast training mode is an adaptive decay method that uses an initial learning rate at  
258  $1e^{-3}$ , decreases the learning rate by a factor of 0.1 when the validation rate goes up and down  
259 for five rounds and stops after two times of decay. A second nonstop training mode allows  
260 users to decide when to stop and continue using a lower learning rate.  
261

## 262 Dropout and L2 Regularization

263 Although more than three million labeled truth variants are available for training, the scarcity  
264 of some labels, especially variants with a long indel length, could fail the model training by  
265 overfitting to abundantly labeled data. To alleviate the class imbalance, we apply both  
266 dropout<sup>20</sup> and L2 regularization<sup>21</sup> techniques in our study. Dropout is a powerful  
267 regularization technique. During training, dropout randomly ignoring nodes in a layer with  
268 probability  $p$ , then sums up the activations of remaining nodes and finally magnify the sum  
269 by  $1/p$ . Then during testing, the algorithm sums up the activations of all nodes with no  
270 dropout. With probability  $p$ , the dropout technique is creating up to  $1 \div (1 - p)^n$  possible  
271 subnetworks during the training. Therefore, dropout can be seen as dividing a network into  
272 subnetworks with reused nodes during training. However, for a layer with just enough nodes  
273 available, applying dropout will require more nodes to be added, thus potentially increasing  
274 the time needed to train a model. In balance, we applied dropout only to the first fully  
275 connected layer (FC4) with  $p=0.5$ , and L2 regularization to all the hidden layers in  
276 Clairvoyante. In practice, we set the lambda of L2 regularization the same as the learning  
277 rate.  
278

## 279 Visualization

280 We created an interactive python notebook accessible within a web browser or a command  
281 line script for visualizing inputs and their corresponding node activations in hidden layers and  
282 output layers. **Supplementary Figure 1** shows the input and node activations in all hidden  
283 layers and output layers of an A>G SNP variant in sample HG002 test against a model  
284 trained with samples from HG001 for a thousand epochs at  $1e^{-3}$  learning rate. Each of the  
285 nodes can be considered as a feature deduced through a chain of nonlinear transformations of  
286 the read alignments input.  
287

## 288 Computational Performance

289 Making Clairvoyante a computationally efficient tool that can run on modern desktop and  
290 server computers with commodity configurations is one of our primary targets. Here, we  
291 introduce the two critical methods used for decreasing computational time and memory  
292 consumption.

293

294 Clairvoyante can be roughly divided into two groups of code, one is sample preparation  
295 (preprocessing and model training), and the second is sample evaluation (model evaluation  
296 and visualization). Model training runs efficiently because it invokes Tensorflow, which is  
297 maintained by a large developer community and has been intensively optimized with most of  
298 its performance critical code written in C, C++ or CUDA. Using the native python  
299 interpreter, sample preprocessing became the bottleneck, and the performance did not  
300 improve by using multi-threading due to the existence of Global Interpreter Lock (GIL). We  
301 solved the problem by using Pypy<sup>22</sup>, a Just-In-Time (JIT) compiler that performs as an  
302 alternative to the native python interpreter and requires no change to our code. In our study,  
303 Pypy sped up the sample preparation code by 5 to 10 times.

304

305 The memory consumption in model training was also a concern. For example, with a naïve  
306 encoding, HG001 requires 40GB memory to store the variant and non-variant samples, which  
307 could prevent effective GPU utilization. We observed that these samples are immutable and  
308 follow the “write once, read many” access pattern. Thus, we applied in-memory compression  
309 using the blosc<sup>23</sup> library with the lz4hc compression algorithm, which provides a high  
310 compression ratio, 100MB/s compression rate, and an ultra-fast decompression rate at 7GB/s.  
311 Our benchmarks show that applying in-memory compression does not impact the speed but  
312 decreased the memory consumption by five times.

## 313 Results

314 In this section, we first benchmarked Clairvoyante on Illumina, PacBio, and ONT data at  
315 known variant sites. Based on the benchmarking results, we have addressed several important  
316 questions regarding the results, the model training, and the input data. Last, we evaluated  
317 Clairvoyante’s performance to call variants genome-wide.

318

### 319 Training Runtime Performance

320 We recommend using GPU acceleration for model training and CPU-only for variant calling.  
321 **Table 1** shows the performance of different GPU and CPU models in training. Using a high-  
322 performance desktop GPU model GTX 1080 Ti, 170 seconds are needed per epoch, which  
323 leads to about 5 hours to finish training a model with the fast training mode. However, for  
324 variant calling the speed up by GPU is insignificant because CPU workloads such as VCF  
325 file formatting and I/O operations dominate. Variant calling at 3.5M known variant sites  
326 takes about 20 minutes using 28 CPU cores. Variant calling genome-wide varies between 30  
327 minutes to a few hours subject to which sequencing technology and alternative allele  
328 frequency cutoff were used.

329

330

331 **Table 1.** Time per epoch of different models of GPU and CPU in model training.

| Equipment                      | Seconds per Epoch<br>per 11M samples |
|--------------------------------|--------------------------------------|
| GTX 1080 Ti                    | 170                                  |
| GTX 980                        | 250                                  |
| GTX Titan                      | 520                                  |
| Tesla K40 w/ top power setting | 580                                  |
| Tesla K40                      | 620                                  |
| Tesla K80 (one socket)         | 700                                  |
| GTX 680                        | 780                                  |
| Intel Xeon E5-2680 v4 28-core  | 2900                                 |



332

### 333 Call Variants at Known Sites

334 Clairvoyante was designed targeting SMS, nevertheless, the method is generally applicable  
335 for short read data as well. We benchmarked Clairvoyante on three sequencing technologies:  
336 Illumina, PacBio, and ONT using both the fast and the nonstop training mode. In nonstop  
337 training mode, we started training the model from 0 to 999-epoch at learning rate  $1e^{-3}$ , then to  
338 1499-epoch at  $1e^{-4}$ , and finally to 1999-epoch at  $1e^{-5}$ . We then benchmarked the model  
339 generated by the fast mode, and all three models stopped at different learning rates in the  
340 nonstop mode. We also benchmarked variant calling on one sample (e.g., HG001) using a  
341 model trained on another sample (e.g., HG002). Further, we ran GATK UnifiedGenotyper<sup>6</sup>  
342 and GATK HaplotypeCaller<sup>6</sup> for comparison. Noteworthy, GATK UnifiedGenotyper was  
343 superseded by GATK HaplotypeCaller, thus for Illumina data, we should refer to the results  
344 of HaplotypeCaller as the true performance of GATK. However, our benchmarks show that  
345 UnifiedGenotyper performed better than HaplotypeCaller on the PacBio and ONT data, thus  
346 we also benchmarked UnifiedGenotyper for all three technologies for users to make parallel  
347 comparisons. We also attempted to benchmark other tools for SMS reads including PacBio  
348 GenomicConsensus v5.1<sup>24</sup>, and Nanopolish v0.9.0<sup>25</sup>, but we only completed the benchmark  
349 with Nanopolish. The reason why the other tools failed, and the commands used for  
350 generating the results in this section are presented in **Supplementary Material, Call**  
351 **Variants at Known Sites, Commands.**

352

353 The benchmarks at known GIAB truth variant sites i) provides a clear view of how  
354 sequencing technologies perform differently with Clairvoyante and other tools in the high  
355 confident genome regions, which in turn ii) enables the detailed assessment of Clairvoyante  
356 including testing for overfitting, higher data quality and network capacity. The benchmarks  
357 also iii) support the expected performance of Clairvoyante on a typical precision medicine  
358 application that only tens to hundreds of clinically relevant or actionable variants are being  
359 genotyped. This is becoming increasingly important in recent days as SMS is becoming more  
360 widely used for clinical diagnosis of structural variations, but at the same time, doctors and  
361 researchers also want to know if there exist any actionable or incidental small variants  
362 without additional short read sequencing<sup>26</sup>. So firstly, we have evaluated Clairvoyante's  
363 performance on known GIAB truth variant sites before extending the evaluation genome-  
364 wide. The latter is described in the section named "**Genome-wide variant identification**".

365

366 We used the submodule *vcfeval* in RTG Tools<sup>27</sup> version 3.7 to benchmark our results and  
367 generate three metrics including Precision, Recall, and F1-score. From the number of true  
368 positives (*TP*), false positives (*FP*), and false negatives (*FN*), we compute the three metrics  
369 as Precision =  $TP \div (TP + FP)$ , Recall =  $TP \div (TP + FN)$ , and F1-score =  $2TP / (2TP +$   
370  $FN + FP)$ . *FP* are defined as variants existing in the GIAB dataset that also identified as a  
371 variant by Clairvoyante, but with discrepant variant type, alternative allele or zygosity. *FN*  
372 are defined as the variants existing in the GIAB dataset but identified as a non-variant by  
373 Clairvoyante. F1-score is the harmonic mean of the precision and recall. RTG *vcfeval* also  
374 provides the best variant quality cutoff for each dataset, filtering the variants under which can  
375 maximize the F1-score. To the best of our knowledge, RTG *vcfeval* was also used by the  
376 GIAB project itself. *vcfeval* cannot deal with Indel variant calls without an exact allele.  
377 However, in our study, Clairvoyante was set to provide the exact allele only for Indels  $\leq 4$ bp.  
378 Thus, for Clairvoyante, all Indels  $>4$ bp were removed from both the baseline and the variant  
379 calls before benchmarking. The commands used for benchmarking are presented in  
380 **Supplementary Material, Benchmarking, Commands.**

381  
382  
383  
384  
385  
386  
387  
388  
389  
390  
391  
392  
393  
394  
395  
396  
397  
398  
399  
400  
401  
402  
403  
404  
405  
406  
407  
408  
409  
410  
411  
412  
413  
414  
415  
416  
417  
418  
419  
420  
421  
422  
423  
424  
425  
426  
427  
428

**Table 2** shows the performance of Clairvoyante on Illumina data. The best accuracy is achieved by calling variants in HG001 using the model trained on HG001 at 1499-epoch, with 99.73% precision, 99.62% recall and 99.68% F1-score. A major concern of using deep learning or any statistical learning technique for variant calling is the potential for overfitting to the training samples. Our results show that Clairvoyante is not affected by overfitting, and we validated the versatility of the trained models by calling variants in a genome using a model trained on a second sample. Interestingly, the performance of calling variants in HG002 using a model trained on HG001 (for convenience, hereafter denoted as HG002>HG001) is 0.25% higher (99.52% against 99.27%) than HG002>HG002 and similar to HG001>HG001. As we know the truth variants in HG001 were verified and rectified by more orthogonal genotyping methods than HG002<sup>12</sup>, we believe it is the higher quality of truth variants in HG001 than HG002 that gave the model trained on HG001 a higher performance. Clairvoyante achieved 0.14% higher (99.68% against 99.57%) F1-score than GATK UnifiedGenotyper on HG001 but 0.03% lower (99.52% against 99.55%) on HG002. This again corroborated the importance of high-quality truth variants for Clairvoyante to achieve superior performance.

**Table 3** shows the performance of Clairvoyante on PacBio data. The best performance is achieved by calling variants in HG001 using the model trained on HG001 at 1999-epoch, with 97.65% precision, 96.53% recall and 97.09% F1-score. As previously reported, DeepVariant<sup>10</sup> has benchmarked the same dataset in their studied and reported 97.25% precision, 88.51% recall and 92.67% F1-score. We noticed our benchmark differs from DeepVariant because we have removed Indels >4bp (e.g. 52,665 sites for GRCh38 and 52,709 for GRCh37 in HG001) from both the baseline and variant calls. If we assume DeepVariant can identify all the 91k Indels >4bp correctly, it's recall will increase to 90.73%, which is still 5.8% lower than Clairvoyante.

**Table 4** shows the performance of Clairvoyante on ONT data. As there are no available deep coverage ONT datasets for HG002, we provided two sets of benchmarks including 1) variant calls in all chromosomes of HG001 using models trained on the same chromosomes, and 2) variant calls in the chromosome 1 of HG001 using models trained on all chromosomes of HG001 except for the chromosome 1. The first benchmark (genome-wide training and calling) achieves the best precision of 95.36% at 1499-epoch. The best recall is 88.70%, and the best F1-score is 91.83%, both achieved at 1999-epoch. The second benchmark (variant calls on Chr1 and genome-wide training) is similar to the first benchmark and is slightly better. It shows the best precision is 96.85%, the best recall is 90.69% and the best F1-score is 93.67%, all achieved at 1999-epoch. We also benchmarked Nanopolish<sup>25</sup> using the same dataset, using 28 CPU cores we called variants in chr19 in about eleven hours. Nanopolish achieved 97.09%, 80.56% and 88.06% on precision, recall, and F1-score, respectively (SNP: 98.10%, 88.91% and 93.28%, Indel: 87.49%, 33.52% and 48.47%). In addition, we have applied Nanopolish to the whole genome of HG001. Also using 28 CPU cores, it finished in 40 days and achieved 97.41%, 84.46% and 90.47% on precision, recall, and F1-score, respectively (SNP: 98.28%, 92.60% and 95.36%, Indel: 88.28%, 37.50% and 52.64%).

**Table 2.** Performance of Clairvoyante on Illumina data at known variant sites. \*: fast training mode.

| Seq. Tech. |  | Ending Learnin | Best Varian | Overall | SNP | Indel |
|------------|--|----------------|-------------|---------|-----|-------|
|------------|--|----------------|-------------|---------|-----|-------|

|          | Model Trained on             | Trained Epochs | Ending Learning Rate and Lambda | Call Variants in | Best Variant Quality Cutoff | Precision | Recall | F1 Score | Precision | Recall | F1 Score | Precision | Recall | F1 Score |        |
|----------|------------------------------|----------------|---------------------------------|------------------|-----------------------------|-----------|--------|----------|-----------|--------|----------|-----------|--------|----------|--------|
| Illumina | HG001                        | 67*            | 1.E-05                          | HG001            | 54                          | 99.68%    | 99.50% | 99.59%   | 99.94%    | 99.92% | 99.93%   | 97.85%    | 96.81% | 97.33%   |        |
|          |                              | 999            | 1.E-03                          |                  | 72                          | 99.71%    | 99.58% | 99.65%   | 99.94%    | 99.93% | 99.94%   | 98.07%    | 97.24% | 97.65%   |        |
|          |                              | 1499           | 1.E-04                          |                  | 93                          | 99.73%    | 99.62% | 99.68%   | 99.94%    | 99.93% | 99.93%   | 98.24%    | 97.52% | 97.88%   |        |
|          |                              | 1999           | 1.E-05                          |                  | 91                          | 99.73%    | 99.62% | 99.68%   | 99.94%    | 99.93% | 99.93%   | 98.23%    | 97.51% | 97.87%   |        |
|          | HG001                        | 67*            | 1.E-05                          | HG002            | 54                          | 99.63%    | 99.38% | 99.50%   | 99.90%    | 99.81% | 99.85%   | 97.63%    | 96.44% | 97.03%   |        |
|          |                              | 999            | 1.E-03                          |                  | 82                          | 99.64%    | 99.41% | 99.52%   | 99.90%    | 99.82% | 99.86%   | 97.72%    | 96.60% | 97.16%   |        |
|          |                              | 1499           | 1.E-04                          |                  | 118                         | 99.60%    | 99.38% | 99.49%   | 99.89%    | 99.81% | 99.85%   | 97.44%    | 96.44% | 96.93%   |        |
|          |                              | 1999           | 1.E-05                          |                  | 129                         | 99.58%    | 99.37% | 99.47%   | 99.89%    | 99.81% | 99.85%   | 97.33%    | 96.33% | 96.83%   |        |
|          | HG002                        | 66*            | 1.E-05                          | HG001            | 60                          | 99.26%    | 98.98% | 99.12%   | 99.50%    | 99.87% | 99.68%   | 97.48%    | 93.22% | 95.30%   |        |
|          |                              | 999            | 1.E-03                          |                  | 83                          | 99.26%    | 99.04% | 99.15%   | 99.51%    | 99.88% | 99.70%   | 97.45%    | 93.43% | 95.40%   |        |
|          |                              | 1499           | 1.E-04                          |                  | 121                         | 99.21%    | 99.00% | 99.11%   | 99.49%    | 99.87% | 99.68%   | 97.12%    | 93.18% | 95.11%   |        |
|          |                              | 1999           | 1.E-05                          |                  | 141                         | 99.20%    | 98.98% | 99.09%   | 99.50%    | 99.87% | 99.68%   | 97.04%    | 93.06% | 95.01%   |        |
|          | HG002                        | 66*            | 1.E-05                          | HG002            | 51                          | 99.29%    | 99.07% | 99.18%   | 99.51%    | 99.85% | 99.68%   | 97.56%    | 93.59% | 95.53%   |        |
|          |                              | 999            | 1.E-03                          |                  | 76                          | 99.32%    | 99.15% | 99.24%   | 99.53%    | 99.87% | 99.70%   | 97.76%    | 94.05% | 95.87%   |        |
|          |                              | 1499           | 1.E-04                          |                  | 75                          | 99.33%    | 99.21% | 99.27%   | 99.52%    | 99.88% | 99.70%   | 97.82%    | 94.30% | 96.03%   |        |
|          |                              | 1999           | 1.E-05                          |                  | 85                          | 99.33%    | 99.21% | 99.27%   | 99.52%    | 99.88% | 99.70%   | 97.83%    | 94.30% | 96.03%   |        |
|          | GATK UnifiedGenotyper, HG001 |                |                                 |                  |                             | 6         | 99.74% | 99.41%   | 99.57%    | 99.89% | 99.92%   | 99.90%    | 98.82% | 96.28%   | 97.54% |
|          | GATK HaplotypeCaller, HG001  |                |                                 |                  |                             | 5         | 99.90% | 99.81%   | 99.85%    | 99.99% | 99.96%   | 99.97%    | 99.34% | 98.92%   | 99.13% |
|          | GATK UnifiedGenotyper, HG002 |                |                                 |                  |                             | 3         | 99.74% | 99.36%   | 99.55%    | 99.86% | 99.84%   | 99.85%    | 98.97% | 96.29%   | 97.61% |
|          | GATK HaplotypeCaller, HG002  |                |                                 |                  |                             | 5         | 99.91% | 99.80%   | 99.86%    | 99.97% | 99.90%   | 99.93%    | 99.51% | 99.19%   | 99.35% |

429  
430  
431

**Table 3. Performance of Clairvoyante on PacBio data at known variant sites. \*: fast training mode.**

| Seq. Tech. | Model Trained on             | Trained Epochs | Ending Learning Rate and Lambda | Call Variants in | Best Variant Quality Cutoff | Overall   |        |          | SNP       |        |          | Indel     |        |          |        |
|------------|------------------------------|----------------|---------------------------------|------------------|-----------------------------|-----------|--------|----------|-----------|--------|----------|-----------|--------|----------|--------|
|            |                              |                |                                 |                  |                             | Precision | Recall | F1 Score | Precision | Recall | F1 Score | Precision | Recall | F1 Score |        |
| PacBio     | HG001                        | 50*            | 1.E-05                          | HG001            | 45                          | 96.91%    | 94.35% | 95.62%   | 99.57%    | 99.47% | 99.52%   | 70.99%    | 60.14% | 65.12%   |        |
|            |                              | 999            | 1.E-03                          |                  | 52                          | 97.46%    | 95.42% | 96.43%   | 99.69%    | 99.65% | 99.67%   | 76.69%    | 67.04% | 71.54%   |        |
|            |                              | 1499           | 1.E-04                          |                  | 55                          | 97.68%    | 96.38% | 97.03%   | 99.74%    | 99.73% | 99.73%   | 79.84%    | 73.45% | 76.51%   |        |
|            |                              | 1999           | 1.E-05                          |                  | 52                          | 97.65%    | 96.53% | 97.09%   | 99.73%    | 99.72% | 99.72%   | 79.91%    | 74.32% | 77.01%   |        |
|            | HG001                        | 50*            | 1.E-05                          | HG002            | 48                          | 96.65%    | 94.16% | 95.39%   | 99.38%    | 99.28% | 99.33%   | 70.67%    | 60.19% | 65.01%   |        |
|            |                              | 999            | 1.E-03                          |                  | 58                          | 96.94%    | 94.43% | 95.67%   | 99.40%    | 99.30% | 99.35%   | 73.40%    | 61.82% | 67.12%   |        |
|            |                              | 1499           | 1.E-04                          |                  | 63                          | 96.66%    | 94.35% | 95.49%   | 99.38%    | 99.28% | 99.33%   | 71.08%    | 60.31% | 65.26%   |        |
|            |                              | 1999           | 1.E-05                          |                  | 60                          | 96.54%    | 94.37% | 95.44%   | 99.38%    | 99.29% | 99.33%   | 70.21%    | 60.11% | 64.76%   |        |
|            | HG002                        | 72*            | 1.E-05                          | HG001            | 38                          | 96.97%    | 93.11% | 95.00%   | 99.33%    | 99.20% | 99.27%   | 69.94%    | 52.43% | 59.93%   |        |
|            |                              | 999            | 1.E-03                          |                  | 68                          | 97.50%    | 92.72% | 95.05%   | 99.29%    | 99.12% | 99.21%   | 74.47%    | 51.93% | 61.19%   |        |
|            |                              | 1499           | 1.E-04                          |                  | 75                          | 96.94%    | 92.98% | 94.92%   | 99.04%    | 98.97% | 99.00%   | 72.28%    | 52.23% | 60.64%   |        |
|            |                              | 1999           | 1.E-05                          |                  | 75                          | 96.68%    | 92.85% | 94.73%   | 98.91%    | 98.85% | 98.88%   | 70.92%    | 51.38% | 59.59%   |        |
|            | HG002                        | 72*            | 1.E-05                          | HG002            | 34                          | 96.83%    | 94.46% | 95.63%   | 99.53%    | 99.47% | 99.50%   | 71.18%    | 60.74% | 65.55%   |        |
|            |                              | 999            | 1.E-03                          |                  | 36                          | 96.83%    | 95.51% | 96.17%   | 99.64%    | 99.62% | 99.63%   | 72.85%    | 66.60% | 69.58%   |        |
|            |                              | 1499           | 1.E-04                          |                  | 68                          | 98.13%    | 95.73% | 96.91%   | 99.74%    | 99.75% | 99.74%   | 82.76%    | 70.96% | 76.40%   |        |
|            |                              | 1999           | 1.E-05                          |                  | 51                          | 97.65%    | 96.33% | 96.99%   | 99.67%    | 99.77% | 99.72%   | 80.21%    | 72.87% | 76.36%   |        |
|            | GATK UnifiedGenotyper, HG001 |                |                                 |                  |                             | 1         | 68.54% | 23.82%   | 35.36%    | 68.54% | 27.40%   | 39.14%    | -      | -        | -      |
|            | GATK HaplotypeCaller, HG001  |                |                                 |                  |                             | 1         | 64.66% | 1.95%    | 3.79%     | 65.30% | 2.24%    | 4.33%     | 7.02%  | 0.02%    | 0.04%  |
|            | GATK UnifiedGenotyper, HG002 |                |                                 |                  |                             | 1         | 69.08% | 23.77%   | 35.37%    | 69.08% | 27.39%   | 39.23%    | -      | -        | -      |
|            | GATK HaplotypeCaller, HG002  |                |                                 |                  |                             | 1         | 66.82% | 1.19%    | 2.33%     | 66.82% | 1.37%    | 2.68%     | 52.00% | 0.003%   | 0.006% |

432  
433  
434

**Table 4. Performance of Clairvoyante on ONT data at known variant sites. \*: fast training mode.**

| Seq. Tech.                   | Model Trained on              | Trained Epochs | Ending Learning Rate and Lambda | Call Variants in | Best Variant Quality Cutoff | Overall   |        |          | SNP       |        |          | Indel     |        |          |        |
|------------------------------|-------------------------------|----------------|---------------------------------|------------------|-----------------------------|-----------|--------|----------|-----------|--------|----------|-----------|--------|----------|--------|
|                              |                               |                |                                 |                  |                             | Precision | Recall | F1 Score | Precision | Recall | F1 Score | Precision | Recall | F1 Score |        |
| Oxford Nanopore              | HG001                         | 110*           | 1.E-05                          | HG001            | 33                          | 94.90%    | 84.35% | 89.34%   | 96.40%    | 92.73% | 94.53%   | 62.49%    | 25.53% | 36.25%   |        |
|                              |                               | 999            | 1.E-03                          |                  | 33                          | 94.07%    | 85.87% | 89.79%   | 96.02%    | 93.23% | 94.60%   | 63.49%    | 34.49% | 44.70%   |        |
|                              |                               | 1499           | 1.E-04                          |                  | 37                          | 95.36%    | 88.12% | 91.59%   | 97.31%    | 95.18% | 96.23%   | 66.91%    | 40.10% | 50.15%   |        |
|                              |                               | 1999           | 1.E-05                          |                  | 37                          | 95.20%    | 88.70% | 91.83%   | 97.28%    | 95.55% | 96.41%   | 66.67%    | 42.06% | 51.58%   |        |
|                              | HG001 (except for chr1)       | 110*           | 1.E-05                          | HG001 (chr1)     | 29                          | 95.71%    | 84.83% | 89.94%   | 96.62%    | 93.02% | 94.79%   | 64.42%    | 27.45% | 38.50%   |        |
|                              |                               | 999            | 1.E-03                          |                  | 29                          | 95.88%    | 87.74% | 91.63%   | 96.11%    | 93.55% | 94.81%   | 65.27%    | 37.29% | 47.47%   |        |
|                              |                               | 1499           | 1.E-04                          |                  | 31                          | 95.85%    | 89.58% | 92.61%   | 97.71%    | 95.63% | 96.66%   | 69.09%    | 43.13% | 53.11%   |        |
|                              |                               | 1999           | 1.E-05                          |                  | 33                          | 96.85%    | 90.69% | 93.67%   | 97.47%    | 95.78% | 96.62%   | 68.63%    | 43.37% | 53.15%   |        |
|                              | Nanopolish, HG001, chr19 only |                |                                 |                  |                             | -         | 97.09% | 80.56%   | 88.06%    | 98.10% | 88.91%   | 93.28%    | 87.49% | 33.52%   | 48.47% |
|                              | Nanopolish, HG001             |                |                                 |                  |                             | -         | 97.41% | 84.46%   | 90.47%    | 98.28% | 92.60%   | 95.36%    | 88.28% | 37.50%   | 52.64% |
| GATK UnifiedGenotyper, HG001 |                               |                |                                 |                  | 0                           | 82.15%    | 15.43% | 25.99%   | 82.15%    | 17.75% | 29.19%   | -         | -      | -        |        |
| GATK HaplotypeCaller, HG001  |                               |                |                                 |                  | 1                           | 75.13%    | 1.26%  | 2.48%    | 75.52%    | 1.45%  | 2.84%    | 16.50%    | 0.01%  | 0.03%    |        |

435  
436  
437  
438

### Characterization of potential false positives and false negatives

While we have arrived at a highly optimized version of Clairvoyante for the experiments in this paper, it is essential to study the remaining FP and FN variant calls and how they are

439 distributed to support for future improvements. To achieve this, on Illumina data, we have  
440 randomly picked 100 FP and 100 FN from the variants called in HG002 using the model  
441 trained on HG001 using the fast training mode (stopped at 67-epoch), generated plots on their  
442 input and output and manually inspected each one. A summary of the results is shown in  
443 **Figure 3**. The most significant category of FP and FN variants, accounting for 71 FP and 42  
444 FN, are variants with two or more alternative alleles at the same position. Clairvoyante does  
445 not currently support this type of variant, and instead, only one allele will be reported (this  
446 limitation is further discussed in the **Discussion**). Except for 1 FP and 7 FN that have no read  
447 coverage at all (because we have downsampled from 300x to 50x), the other 28 FP and 51  
448 FN are errors that Clairvoyante should avoid. Among them, 13 FP and 2 FN failed because of  
449 relatively “difficult reference” (low complexity sequence, tandem repeat or homopolymer  
450 run), 3 FP and 18 FN because of “lack of evidence” (depth  $\leq 20$  or even  $\leq 3$ ). The results  
451 suggest that to improve Clairvoyante further, we should increase the accuracy of the variants  
452 in the “difficult reference” regions and increase the sensitivity of the variants “lack of  
453 evidence”. Noteworthy, the 1 FP Clairvoyante made with no read coverage at all is specific to  
454 the “Call variant at known sites” mode since Clairvoyante will decide on each known site  
455 regardless of covered or not. This type of FP could be easily eliminated by filtering the  
456 variants with zero depth, but we have retained it in our study to show a complete spectrum of  
457 errors Clairvoyante has made. More details for each FP and FN are shown in **Supplementary**  
458 **Tables 1, and 2** and the plots are available online (**Supplementary Material, Call Variants**  
459 **at Known Sites, Resources, FP/FN plots**).  
460

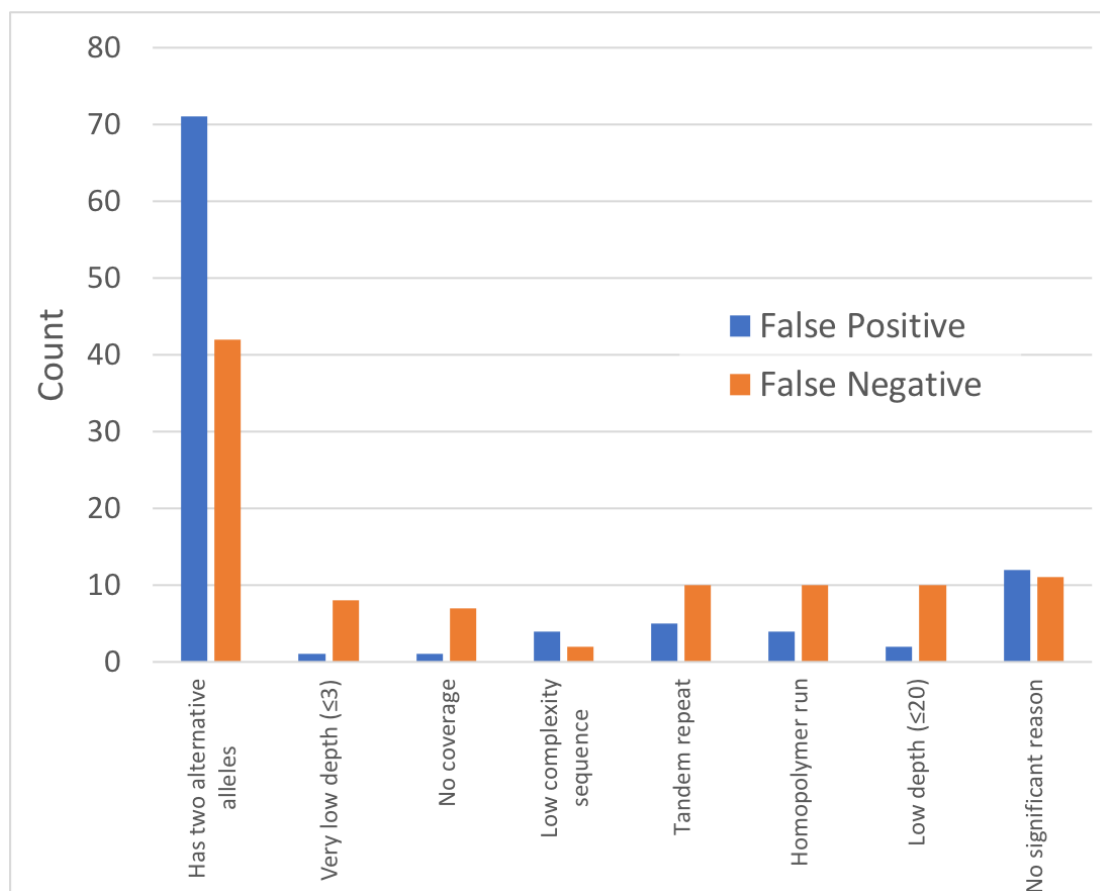

461 **Figure 3.** Summary of the reason for failure on 100 randomly picked false positive variants,  
462 and 100 randomly picked false negative variants.  
463  
464

465 Can lower learning rate and longer training provide better performance?

466 The benchmarking results on the three models stopping at different learning rates allow us to  
467 study whether lower learning rate can provide better results and derive how much training is  
468 enough. For ONT, both from 999-epoch to 1499-epoch and from 1499-epoch to 1999-epoch,  
469 significant improvements were observed. However, in PacBio (**Table 3**), from 1499-epoch to  
470 1999-epoch, the F1-Score increased (97.03% to 97.09%, 96.91% to 96.99%) when both  
471 variant calling and model training is using the same sample, but decreased (95.49% to  
472 95.44%, 94.92% to 94.73%) when using different samples. The results suggest that  
473 Clairvoyante was overfitting the training data with a too low learning rate. The same behavior  
474 is also observed in Illumina data (**Table 2**). Thus, we suggest the Clairvoyante users to 1)  
475 stop at a higher learning rate for less noisy data; 2) train multiple samples stopping at  
476 different learning rates and select the best through performance evaluation; or 3) use a model  
477 trained on truth variants from multiple samples.  
478

479 Can a model train on truth variants from multiple samples provide better  
480 performance?

481 Intuitively, a model trained on truth variants from two or more samples should perform better  
482 than those trained on just a single sample, provided that the truth variants from different  
483 samples have similar high quality. The model might even be more versatile if the  
484 characteristics of input, such as average depth, differ between samples. To verify our  
485 hypothesis, we benchmarked the variants called in HG003 (**Supplementary Material, Data  
486 Source, PacBio Data**) on three different models trained on 1) HG001; 2) HG002, and; 3)  
487 HG001+HG002. All three models were trained for 1000 epochs at learning rate  $1e^{-3}$ , then  
488 another 500 epochs at learning rate  $1e^{-4}$ . Noteworthy, the time used for training the  
489 HG001+HG002 model doubled, as it doubled the number of true variants and paired non-  
490 variants. If our hypothesis is correct, the variant calling performance should increase for  
491 HG003 when using the HG001+HG002 model than the HG001 model or the HG002 model.  
492 The results are shown in **Table 5**. Using the HG001+HG002 model, the F1-score is 0.55%  
493 higher than using HG001 only and 2.88% higher than using the HG002 only. We conclude  
494 that using multiple samples for model training can increase the performance of Clairvoyante,  
495 although we expect marginal improvement gains when using more than a few samples.  
496  
497

498 **Table 5.** Performance of variant calls in HG003 on three different models including HG001  
499 only, HG002 only and HG001+HG002.

| Train using Variants in | Best Variant Quality Cutoff | Overall   |        |          | SNP       |        |          | Indel     |        |          |
|-------------------------|-----------------------------|-----------|--------|----------|-----------|--------|----------|-----------|--------|----------|
|                         |                             | Precision | Recall | F1 Score | Precision | Recall | F1 Score | Precision | Recall | F1 Score |
| HG001                   | 72                          | 95.61%    | 90.51% | 92.99%   | 95.61%    | 90.51% | 92.99%   | 95.61%    | 90.51% | 92.99%   |
| HG002                   | 71                          | 93.38%    | 88.09% | 90.66%   | 93.38%    | 88.09% | 90.66%   | 93.38%    | 88.09% | 90.66%   |
| HG001 + HG002           | 56                          | 95.91%    | 91.29% | 93.54%   | 95.91%    | 91.29% | 93.54%   | 95.91%    | 91.29% | 93.54%   |

500

501 Can a higher input data quality improve the variant calling performance?

502 In Table 4, we used the ‘rel3’ ONT dataset generated by the Nanopore WGS consortium.  
503 Very recently, the consortium released an augmented dataset labeled ‘rel5’ (see  
504 **Supplementary Material, Data Source, Oxford Nanopore Data**). The ‘rel5’ data are a  
505 merge of NA12878 DNA sequencing data from ‘rel3’ (regular sequencing protocols, about  
506 30x) and ‘rel4’ (ultra-read set, 7.7x extra), recalled with the latest base-caller. Thus, we

507 expect to see improved performance, given that the input data quality limited the  
508 performance of Clairvoyante on ONT. We trained a model on ‘rel5’ for 999 epochs at  
509 learning rate  $1e^{-3}$ . Compare to ‘rel3’, the precision improved from 94.07% to 97.21%, the  
510 recall improved from 85.87% to 88.80%, and the F1-Score improved from 89.79% to  
511 92.81%. Thus, the results reflect our intuition that Clairvoyante’s performance on ONT data  
512 is limited by the input data quality and thus will improve over time as the technology, base-  
513 calling mature, and more data become available.

## 514 Network topology and capacity evaluation

515 In the previous subsection, we have shown Clairvoyante’s capacity to perform better on noisy  
516 PacBio and ONT data when trained with more data of higher quality. We next evaluated the  
517 performance by considering a “slim version” of Clairvoyante with smaller capacity that could  
518 potentially improve computational requirements. With the slim version, we expect to see a  
519 greater performance in higher quality Illumina data than noisy data like ONT and PacBio  
520 data as the classification problem is easier with less noisy data. The slim version includes  
521 165k parameters, which is about ten times fewer than the original version. Instead of  
522 isometrically scaling down the original network, we evaluated several different designs  
523 resulting in some network components with significantly reduced runtime than others or even  
524 reducing the parameters by ten times while still achieving the best runtime and F1-Score  
525 possible.  
526

527  
528 Our final slim network design removes the pooling between convolutional layers, slightly  
529 enlarged the kernel size in convolution and reduced the number of nodes in the two fully-  
530 connected layers by ten times. We trained models using the fast training mode on HG001 and  
531 benchmarked the Illumina, PacBio and ONT data on both HG001 and HG002. The results are  
532 shown in **Table 6**. As expected, the F1-scores degraded least in the Illumina datasets (0.82%  
533 and 0.73%) and degraded most in the ONT dataset (2.23%), with PacBio in the middle  
534 (1.68% and 1.90%). The slim version is available as a part of the Clairvoyante toolset and can  
535 be enabled with option ‘--slim.’  
536

537

538

539 **Table 6.** F1-scores of different datasets on different network designs. Both the original  
540 models and slim models were trained on HG001 using the fast training mode.

|          | Illumina |        | PacBio |        | ONT    |
|----------|----------|--------|--------|--------|--------|
| Models:  | HG001    | HG002  | HG001  | HG002  | HG001  |
| Original | 99.59%   | 99.50% | 95.62% | 95.39% | 89.34% |
| Slim     | 98.77%   | 98.77% | 93.94% | 93.49% | 87.11% |
| Degraded | 0.82%    | 0.73%  | 1.68%  | 1.90%  | 2.23%  |

541

## 542 Genome-wide Variant Identification

543 Beyond benchmarking variants at sites known to be variable in a sample, in this section, we  
544 benchmarked Clairvoyante’s performance on calling variants genome-wide. Calling variants  
545 genome-wide is challenging because it tests not only how good Clairvoyante can derive the  
546 correct variant type, zygosity and alternative allele of a variant when evidence is marginal,  
547 but also in reverse, how good Clairvoyante can filter/suppress a non-variant even in the  
548 presence of sequencing errors or other artificial signals. Instead of naively evaluating all three  
549 billion sites of the whole genome with Clairvoyante, we tested the performance at different  
550 alternative allele cutoffs for all three sequencing technologies. As expected, a higher allele  
551 cutoff speeds up variant calling by producing fewer candidates to be tested by Clairvoyante  
but worsens recall especially for noisy data like PacBio and ONT. Our experiments provide a

552 reference point on how to choose a cutoff for each sequencing technology to achieve a good  
 553 balance between recall and running speed. All models were trained for 1000 epochs with  
 554 learning rate at  $1e^{-3}$ . All the experiments were performed on two Intel Xeon E5-2680 v4  
 555 using all 28 cores. The commands used for generating the results in this section are presented  
 556 in **Supplementary Material, Call Variants Genome-wide, Commands**.

557  
 558 The results are shown in **Table 7**. As expected, with higher alternative allele frequency  
 559 threshold (0.2), the precision was higher while the recall and time consumption was reduced  
 560 in all experiments. For Illumina data, the best F1-score (with 0.2 allele frequency) for  
 561 Clairvoyante was 98.65% for HG001 and 98.61% for HG002. The runtime varied between  
 562 half and an hour (40 minutes for the best F1-score). As expected, GATK HaplotypeCaller  
 563 topped the performance on Illumina data - achieved F1-score 99.76% for HG001 and 99.70%  
 564 for HG002; both ran for about 8 hours. GATK UnifiedGenotyper ran as fast as Clairvoyante  
 565 on Illumina data and achieved F1-score 99.43% for HG001 and 99.08% for HG002.  
 566 Inspecting the false positive and false negative variant calls for Clairvoyante, we found about  
 567 0.19% in FP, and 0.15% in FN was because of scenarios of two alternative alleles. We  
 568 realized, on Illumina data, Clairvoyante is not performing on-par with the state-of-the-art  
 569 GATK HaplotypeCaller, which was intensively optimized for Illumina data. However, as  
 570 Clairvoyante uses an entirely different algorithm than GATK, Clairvoyante's architecture  
 571 could be used as an orthogonal method, emulating how geneticists manually validate a  
 572 variant using a genome browser, for filtering or validating GATK's results to increase  
 573 GATK's accuracy further. We implemented this in a method called Skyhawk. It repurposed  
 574 Clairvoyante's neural network to work on the GATK's variants, give them another quality  
 575 score in addition to the existing one by GATK, and give suggestion on disagreed answers.  
 576 More details are available in Skyhawk's preprint<sup>28</sup>. With the success of developing  
 577 Skyhawk, we expect to see in the future, more applications would be developed upon  
 578 Clairvoyante's network architecture.

579  
 580 For the PacBio data, the best F1-scores were also achieved at 0.2 allele frequency cutoff. The  
 581 best F1-score is 92.57% for HG001 and 93.05% for HG002 running Clairvoyante for ~3.5  
 582 hours. In contrast, as reported in their paper<sup>10</sup>, DeepVariant has achieved 35.79% F1-score  
 583 (22.14% precision, 93.36% recall) on HG001 with PacBio data. The runtime for Clairvoyante  
 584 at 0.25 frequency cutoff is about 2 hours, which is about half the time consumption at 0.2  
 585 frequency cutoff, and about 1/5 the time consumption at 0.1 frequency cutoff. For ONT data  
 586 (rel3), the best F1-score 77.89% was achieved at 0.1 frequency cutoff. However, the F1-score  
 587 at 0.25 frequency cutoff is just slightly lower (76.95%), but ran about five times faster, from  
 588 13 hours to less than three hours. Thus, we suggest using 0.25 as the frequency cutoff. The  
 589 runtime is on average about 1.5 times longer than PacBio, due to the higher level of noise in  
 590 data. Using the new rel5 ONT data with better base calling quality, the best F1-score has  
 591 increased from 87.26% (9.37% higher than rel3). The recall of SNP and the precision of Indel  
 592 were the most substantially increased.

593  
 594

595 **Table 7.** Performance of using Clairvoyante for variant calling genome-wide on Illumina,  
 596 PacBio and ONT datasets. All models were trained for 1000 epochs with learning rate at  $1e^{-3}$ .

| Seq. Tech | Train using Variant s in | Call Variant s in | Alt. Allele Freq. Cutoff | Best Variant Quality Cutoff | Time Consumption | Overall   |        |          | SNP       |        |          | Indel     |        |          |
|-----------|--------------------------|-------------------|--------------------------|-----------------------------|------------------|-----------|--------|----------|-----------|--------|----------|-----------|--------|----------|
|           |                          |                   |                          |                             |                  | Precision | Recall | F1 Score | Precision | Recall | F1 Score | Precision | Recall | F1 Score |
| Illumina  | HG001                    | HG001             | 0.1                      | 189                         | 1:08             | 98.16%    | 98.93% | 98.55%   | 98.10%    | 99.92% | 99.00%   | 98.63%    | 96.96% | 97.79%   |
|           |                          |                   | 0.2                      | 182                         | 0:43             | 98.41%    | 98.88% | 98.65%   | 98.38%    | 99.90% | 99.13%   | 98.70%    | 95.10% | 96.86%   |
|           |                          |                   | 0.25                     | 180                         | 0:26             | 98.71%    | 97.95% | 98.33%   | 98.72%    | 99.82% | 99.27%   | 98.62%    | 87.33% | 92.63%   |

|                        |                              |       |       |      |        |        |        |        |        |        |        |        |        |        |        |
|------------------------|------------------------------|-------|-------|------|--------|--------|--------|--------|--------|--------|--------|--------|--------|--------|--------|
|                        | HG002                        | 0.1   | 192   | 1:11 | 98.13% | 98.77% | 98.45% | 98.08% | 99.81% | 98.94% | 98.50% | 96.54% | 97.51% |        |        |
|                        |                              | 0.2   | 183   | 0:41 | 98.35% | 98.77% | 98.56% | 98.33% | 99.78% | 99.05% | 98.51% | 94.90% | 96.67% |        |        |
|                        |                              | 0.25  | 182   | 0:30 | 98.67% | 97.88% | 98.27% | 98.70% | 99.69% | 99.19% | 98.43% | 87.34% | 92.55% |        |        |
|                        | HG002                        | HG001 | 0.1   | 198  | 1:16   | 98.59% | 98.50% | 98.54% | 98.68% | 99.88% | 99.27% | 97.98% | 93.37% | 95.62% |        |
|                        |                              |       | 0.2   | 192  | 0:47   | 98.75% | 98.39% | 98.57% | 98.84% | 99.86% | 99.35% | 98.07% | 91.69% | 94.78% |        |
|                        |                              |       | 0.25  | 184  | 0:25   | 98.94% | 97.60% | 98.27% | 99.07% | 99.78% | 99.42% | 97.91% | 85.01% | 91.00% |        |
|                        |                              | HG002 | 0.1   | 195  | 1:07   | 98.53% | 98.59% | 98.56% | 98.59% | 99.85% | 99.22% | 98.12% | 93.78% | 95.90% |        |
|                        |                              |       | 0.2   | 188  | 0:44   | 98.71% | 98.50% | 98.61% | 98.77% | 99.81% | 99.29% | 98.22% | 92.24% | 95.14% |        |
|                        |                              |       | 0.25  | 182  | 0:25   | 98.95% | 97.73% | 98.33% | 99.05% | 99.71% | 99.38% | 98.11% | 85.73% | 91.50% |        |
|                        | GATK UnifiedGenotyper, HG001 |       |       | 51   | 0:46   | 99.43% | 99.42% | 99.43% | 99.53% | 99.91% | 99.72% | 98.76% | 96.47% | 97.60% |        |
|                        | GATK HaplotypeCaller, HG001  |       |       | 5    | 8:45   | 99.69% | 99.83% | 99.76% | 99.77% | 99.97% | 99.87% | 99.22% | 98.97% | 99.09% |        |
|                        | GATK UnifiedGenotyper, HG002 |       |       | 4    | 0:46   | 98.76% | 99.41% | 99.08% | 98.73% | 99.85% | 99.29% | 98.91% | 96.57% | 97.73% |        |
|                        | GATK HaplotypeCaller, HG002  |       |       | 5    | 8:23   | 99.59% | 99.81% | 99.70% | 99.62% | 99.90% | 99.76% | 99.39% | 99.24% | 99.32% |        |
|                        | PacBio                       | HG001 | 0.1   | 157  | 9:46   | 96.31% | 88.63% | 92.31% | 96.72% | 99.49% | 98.09% | 79.19% | 31.13% | 44.69% |        |
|                        |                              |       | 0.2   | 130  | 3:53   | 98.12% | 87.62% | 92.57% | 98.96% | 96.60% | 97.77% | 75.87% | 31.50% | 44.52% |        |
|                        |                              |       | 0.25  | 125  | 2:01   | 98.62% | 83.11% | 90.20% | 99.39% | 91.38% | 95.22% | 78.55% | 27.10% | 40.30% |        |
| HG002                  |                              | 0.1   | 153   | 9:24 | 97.00% | 89.08% | 92.87% | 97.90% | 99.15% | 98.52% | 71.57% | 34.26% | 46.34% |        |        |
|                        |                              | 0.2   | 132   | 3:34 | 97.93% | 88.30% | 92.86% | 99.03% | 97.05% | 98.03% | 73.37% | 34.06% | 46.53% |        |        |
|                        |                              | 0.25  | 116   | 1:46 | 98.06% | 84.69% | 90.89% | 99.18% | 92.53% | 95.74% | 75.56% | 31.24% | 44.21% |        |        |
| HG002                  |                              | HG001 | 0.1   | 163  | 14:55  | 95.58% | 86.69% | 90.92% | 96.64% | 98.96% | 97.79% | 59.19% | 24.52% | 34.67% |        |
|                        |                              |       | 0.2   | 147  | 3:29   | 97.49% | 85.64% | 91.18% | 98.94% | 96.13% | 97.51% | 58.24% | 23.65% | 33.64% |        |
|                        |                              |       | 0.25  | 139  | 1:39   | 98.16% | 81.47% | 89.04% | 99.27% | 90.90% | 94.90% | 66.31% | 21.11% | 32.02% |        |
|                        |                              | HG002 | 0.1   | 150  | 15:31  | 97.10% | 89.31% | 93.04% | 98.33% | 99.14% | 98.73% | 69.19% | 39.77% | 50.51% |        |
|                        |                              |       | 0.2   | 134  | 3:34   | 98.09% | 88.51% | 93.05% | 99.35% | 97.30% | 98.32% | 72.20% | 36.59% | 48.57% |        |
|                        |                              |       | 0.25  | 118  | 1:46   | 98.20% | 84.76% | 90.98% | 99.47% | 92.77% | 96.00% | 72.94% | 31.44% | 43.94% |        |
| Oxford Nanopore (rel3) |                              | HG001 | HG001 | 0.1  | 140    | 13:01  | 86.24% | 71.01% | 77.89% | 86.79% | 91.85% | 89.25% | 55.36% | 10.69% | 17.93% |
|                        |                              |       |       | 0.2  | 139    | 4:47   | 87.24% | 70.21% | 77.80% | 87.72% | 87.97% | 87.85% | 59.05% | 9.90%  | 16.96% |
|                        |                              |       |       | 0.25 | 136    | 2:40   | 87.76% | 68.51% | 76.95% | 88.25% | 82.86% | 85.47% | 59.41% | 9.26%  | 16.03% |
|                        | 0.35                         |       |       | 130  | 1:30   | 90.96% | 57.43% | 70.41% | 91.34% | 65.82% | 76.51% | 67.35% | 6.62%  | 12.06% |        |
| Oxford Nanopore (rel5) | HG001                        | HG001 | 0.2   | 162  | 5:53   | 88.76% | 85.81% | 87.26% | 88.95% | 93.76% | 91.29% | 72.10% | 8.32%  | 14.92% |        |
|                        |                              |       | 0.25  | 159  | 3:12   | 89.14% | 82.20% | 85.53% | 89.34% | 90.09% | 89.71% | 72.45% | 8.02%  | 14.45% |        |
|                        |                              |       | 0.35  | 148  | 1:51   | 91.22% | 67.88% | 77.83% | 91.48% | 75.18% | 82.53% | 71.25% | 6.54%  | 11.98% |        |

597

598

599

600

601

For readers to compare the whole-genome benchmarks to those at the GIAB known sites more efficiently, we summarized the best precision, recall, and F1-score of both types of benchmarks in **Supplementary Table 3**.

## 602 Benchmarks of other state-of-the-art variant callers

603 DeepVariant is the first deep neural network based variant caller<sup>10</sup>. After the first preprint of  
604 Clairvoyante was available, Google released a new version of DeepVariant (v0.6.1). On  
605 Illumina data, the new version was reported to be outperforming the previous versions. We  
606 benchmarked the new version to see how it performs on Illumina data and especially on SMS  
607 data. We used DeepVariant version 0.6.1 for benchmarking following guide "Improve  
608 DeepVariant for BGISEQ germline variant calling" written by Pi-Chuan Chang available at  
609 link <https://goo.gl/tg4FWG> with specific guidelines for how to run DeepVariant, including 1)  
610 model training using transfer-learning and multiple depths, and 2) variant calling.

611

612 On Illumina data, DeepVariant performed extraordinarily (**Table 8**) and matched with the  
613 figures previously reported. Following the guide, we applied transfer-learning using both the  
614 truth variants and reference calls in chromosome 1 upon the trained model named  
615 "DeepVariant-inception\_v3-0.6.0+cl-191676894.data-wgs\_standard/model.ckpt" that was  
616 delivered together with the software binaries. Using a nVidia GTX1080 Ti GPU, we kept  
617 running the model training process for 24 hours and picked the model with the best F1-score  
618 (using chromosome 22 for validation purpose), which was achieved at about 65 minutes after  
619 the training had started. The variant calling step comprises three steps: 1) create calling  
620 candidates, 2) variant calling, and 3) post-processing. Using 24 CPU cores, step one ran for  
621 392 minutes and generated 42GB of data. The second step utilized GPU and took 166  
622 minutes. Step 3 ran for only 25 minutes and occupied significantly more memory (15GB)  
623 than the previous two steps. For the HG001 sample, the precision rate is 0.9995, and the



624 recall rate is 0.9991, both extraordinary and exceeding all other available variant callers  
625 including Clairvoyante on Illumina datasets.

626

627 DeepVariant requires base-quality, thus failed on the PacBio dataset, in which base-quality is  
628 not provided. On ONT data (rel5), DeepVariant performed much better than the traditional  
629 variant callers that were not designed for long reads, but it performed worse than  
630 Clairvoyante (**Table 8**). We also found that DeepVariant's computational resource  
631 consumption on long reads is prohibitively high and we were only able to call variants in few  
632 chromosomes. The details are as follows. Using transfer-learning, we trained two models for  
633 ONT data on chromosome 1 and 21 respectively, and we called variants in chromosome 1  
634 and 22 against the different models. In total we have benchmarked three settings, 1) call  
635 variants in chromosome 1 against the chromosome 21 model, 2) call variants in chromosome  
636 22 against the chromosome 21 model, and 3) call variants in chromosome 22 against the  
637 chromosome 1 model. Training the models required about 1.5 days until the validation  
638 showed a decreasing F1-score with further training. Using 24 CPU cores, the first step of  
639 variant calling generated 337GB candidate variants data in 1,683 minutes for chromosome 1  
640 and generated 53G data in 319 minutes for chromosome 21. The second step of variant  
641 calling took 1,171 and 213 minutes to finish for chromosome 1 and 22, respectively. The last  
642 step took 160 minutes and was very memory intensive, requiring 74GB of RAM for  
643 chromosome 1. In terms of F1-score, DeepVariant has achieved 83.05% in chromosome 1,  
644 and 77.89% in chromosome 22, against the model trained on chromosome 21. We verified  
645 that more samples for model training do not lead to better variant calling performance - using  
646 the model trained on chromosome 1, the F1-score dropped slightly to 77.09% for variants in  
647 chromosome 22. Using the computational resource consumption on chromosome 1, we  
648 estimate the current version of DeepVariant would require 4TB storage and about one month  
649 for whole genome variant calling of a genome sequenced with long reads.

650

651 We further benchmarked three additional variant callers<sup>29</sup>, including Vardict<sup>30</sup> (v20180724),  
652 LoFreq<sup>31</sup> (v2.1.3.1), and FreeBayes<sup>32</sup> (v1.1.0-60-gc15b070) (**Table 8**). The performance of  
653 Vardict on Illumina data matches the previous study<sup>29</sup>. Vardict requires base quality, thus  
654 failed on the PacBio dataset, in which base quality is not provided. Vardict identified only  
655 62,590 variants in the ONT dataset, among them only 231 variants are true positives. The  
656 results match with Vardict's paper that was tested on the Illumina data but not yet ready for  
657 Single Molecule Sequencing long reads. The performance of LoFreq on Illumina data  
658 matches the previous study<sup>29</sup> calling SNP only. To enable Indel calling in LoFreq, BAQ  
659 (Base Alignment Quality)<sup>33</sup> needs to be calculated in advance. However, the BAQ calculation  
660 works only for Illumina reads, thus for LoFreq, we only benchmarked its performance in  
661 SNP calling. Meanwhile, LoFreq does not provide zygosity in the result, prohibited us from  
662 using "RTG vcfeval" for performance evaluation. Thus, we considered a true positive in  
663 LoFreq as having a matched truth record in 1) chromosome, 2) position and 3) alternative  
664 allele. LoFreq requires base quality, thus failed on the PacBio dataset, in which base quality  
665 is not provided. The results suggest that LoFreq is capable of SNP detection in Single  
666 Molecule Sequencing long reads. Unfortunately, we were unable to finish running Freebayes  
667 on both the PacBio dataset and the ONT dataset after they failed to complete on either dataset  
668 after running for one month. According to the percentage of genome covered with variant  
669 calls, we estimate several months, 65 and 104 machine days on a latest 24-core machine, are  
670 required for a single PacBio and ONT dataset, respectively.

671

672 GIAB datasets were constructed from a consensus of multiple short-variant callers, thus tend  
673 to bias toward easy regions that are accessible by these algorithms<sup>34</sup>. So, we next

674 benchmarked the Syndip dataset, which is a recent benchmark dataset from the *de novo*  
 675 PacBio assemblies of two homozygous human cell lines. As reported, the dataset provides a  
 676 relatively more accurate and less biased estimate of small-variant-calling error rates in a  
 677 realistic context<sup>34</sup>. The results are in **Table 8** and show that, when using Syndip variants for  
 678 training, the performance of calling variants in both HG001 and HG002 at known variants  
 679 remains as good as previously reported. However, using the same model (Syndip), the  
 680 performance dropped both at the Syndip known sites (excluding variants >4bp, from 99.51%  
 681 (HG001) to 98.52%) and for the whole genome (excluding variants >4bp, from 94.88%  
 682 (HG001) to 94.02%). The results support that Syndip contains variants that are harder to  
 683 identify. To improve Clairvoyante’s performance in the hard regions, we suggest users to also  
 684 include Syndip for creating models.

685

686 **Table 8.** Additional benchmark performance of using Clairvoyante and other state-of-the-art  
 687 variant callers.

| Seq. Tech.      | Tool         | Model Trained on    | Call Variants in     | Excluding Indel >4bp | Best Variant Quality Cutoff | Time Consumption | Overall   |        |          | SNP       |        |          | Indel     |        |          |
|-----------------|--------------|---------------------|----------------------|----------------------|-----------------------------|------------------|-----------|--------|----------|-----------|--------|----------|-----------|--------|----------|
|                 |              |                     |                      |                      |                             |                  | Precision | Recall | F1 Score | Precision | Recall | F1 Score | Precision | Recall | F1 Score |
| Illumina        | Vardict      | N.A.                | HG001                |                      | N.A.                        | 2:51             | 90.56%    | 98.13% | 94.19%   | 94.09%    | 99.46% | 96.70%   | 70.64%    | 88.85% | 78.71%   |
|                 | LoFreq       | N.A.                | HG001                |                      | N.A.                        | 4:03             | SNP only  |        |          | 75.88%    | 94.24% | 84.07%   | -         | -      | -        |
|                 | FreeBayes    | N.A.                | HG001                |                      | 43                          | 4:54             | 98.71%    | 97.95% | 98.33%   | 98.72%    | 99.82% | 99.27%   | 98.62%    | 87.33% | 92.63%   |
|                 | DeepVariant  | TL + Chr1           | HG001                |                      | 3                           | 9:43             | 99.94%    | 99.91% | 99.93%   | 99.99%    | 99.96% | 99.98%   | 99.64%    | 99.59% | 99.62%   |
|                 | FreeBayes    | N.A.                | Syndip               |                      | 19                          | 5:42             | 96.00%    | 94.21% | 95.10%   | 98.91%    | 97.17% | 98.03%   | 78.20%    | 74.54% | 76.32%   |
|                 | Clairvoyante | Syndip              | Syndip               |                      | 70                          | 1:23             | 91.95%    | 93.05% | 92.49%   | 93.49%    | 96.32% | 94.88%   | 80.00%    | 71.13% | 75.30%   |
|                 | Clairvoyante | Syndip              | Syndip               | Y                    | 70                          | 1:23             | 92.75%    | 95.32% | 94.02%   | 93.60%    | 96.22% | 94.89%   | 84.76%    | 86.94% | 85.83%   |
|                 | Clairvoyante | Syndip              | Syndip (Known Sites) | Y                    | 20                          | 0:09             | 98.83%    | 98.22% | 98.52%   | 99.23%    | 98.69% | 98.96%   | 94.97%    | 93.82% | 94.39%   |
|                 | Clairvoyante | Syndip              | HG001                |                      | 76                          | 1:05             | 92.17%    | 96.05% | 94.07%   | 92.63%    | 97.71% | 95.10%   | 89.08%    | 85.91% | 87.46%   |
|                 | Clairvoyante | Syndip              | HG001                | Y                    | 76                          | 1:05             | 92.77%    | 97.09% | 94.88%   | 92.64%    | 97.72% | 95.11%   | 93.71%    | 92.67% | 93.18%   |
|                 | Clairvoyante | Syndip              | HG001 (Known Sites)  | Y                    | 6                           | 0:08             | 99.53%    | 99.50% | 99.51%   | 99.81%    | 99.83% | 99.82%   | 97.58%    | 97.16% | 97.37%   |
|                 | Clairvoyante | Syndip              | HG002                |                      | 74                          | 1:11             | 92.19%    | 96.07% | 94.09%   | 92.61%    | 97.55% | 95.02%   | 89.25%    | 86.64% | 87.93%   |
| Clairvoyante    | Syndip       | HG002               | Y                    | 74                   | 1:11                        | 92.73%           | 97.06%    | 94.85% | 92.62%   | 97.56%    | 95.02% | 93.63%   | 93.43%    | 93.53% |          |
| Clairvoyante    | Syndip       | HG002 (Known Sites) | Y                    | 9                    | 0:08                        | 99.51%           | 99.43%    | 99.47% | 99.77%   | 99.74%    | 99.75% | 97.64%   | 97.13%    | 97.38% |          |
| Oxford Nanopore | Vardict      | N.A.                | HG001                |                      | N.A.                        | 17:12            | 0.42%     | 0.01%  | 0.01%    | 2.56%     | 0.01%  | 0.01%    | 0.04%     | 0.00%  | 0.01%    |
|                 | LoFreq       | N.A.                | HG001                |                      | N.A.                        | 6:58             | SNP only  |        |          | 82.69%    | 54.75% | 65.88%   | -         | -      | -        |
|                 | DeepVariant  | TL + Chr1           | HG001 (Chr22)        |                      | 3                           | 9:19             | 90.97%    | 66.77% | 77.02%   | 91.61%    | 76.70% | 83.50%   | 65.54%    | 8.12%  | 14.45%   |
|                 | DeepVariant  | TL + Chr21          | HG001 (Chr1)         |                      | 3                           | 50:14            | 93.47%    | 74.62% | 82.99%   | 94.36%    | 84.39% | 89.10%   | 65.68%    | 12.06% | 20.38%   |
|                 | DeepVariant  | TL + Chr21          | HG001 (Chr22)        |                      | 3                           | 9:11             | 92.19%    | 67.34% | 77.83%   | 92.87%    | 77.06% | 84.23%   | 69.87%    | 10.33% | 17.99%   |

688

## 689 Potential novel variants unraveled by PacBio and ONT

690 The truth SNPs and Indels provided by GIAB were intensively called and meticulously  
 691 curated, and the accuracy and sensitivity of the GIAB datasets are unmatched. However,  
 692 since the GIAB variants were generated without incorporating any SMS technology<sup>12</sup>, it is  
 693 possible that we can consummate GIAB by identifying variants not yet in GIAB, but  
 694 specifically detected both by using the PacBio and the ONT data. For the HG001 sample  
 695 (variants called in HG001 using a model trained on HG001), we extracted the so-called “false  
 696 positive” variants (identified genome-wide with a 0.2 alternative allele frequency cutoff)  
 697 called in both the PacBio and ONT dataset. Then we calculated the geometric mean of the  
 698 variant qualities of the two datasets, and we filtered the variants with a mean quality lower  
 699 than 135 (calculated as the geometric mean of the two best variant quality cutoffs, 130 and  
 700 139). The resulting catalog of 3,135 variants retained are listed in **Supplementary Table 4**.  
 701 2,732 are SNPs, 298 are deletions, and 105 are insertions. Among the SNPs, 1,602 are

702 transitions, and 1,130 are transversions. The Ti/Tv ratio is  $\sim 1.42$ , which is substantially  
703 higher than random (0.5), suggesting a true biological origin. We manually inspected the top  
704 ten variants in quality using IGV<sup>35</sup> to determine their authenticity (**Figure 4a** and  
705 **Supplementary Figure 2a-2i**). Among the ten variants, we have one convincing example at  
706 2:163,811,179 (GRCh37) that GIAB has previously missed (**Supp. Fig. 2h**). Another seven  
707 examples have weaker supports that need to be further validated using other orthogonal  
708 methods. Possible artifacts including 1) 7:89,312,043 (**Supp. Fig. 2g**) has multiple SNPs in  
709 its vicinity, which is a typical sign of false alignment, 2) 1:566,371 (**Supp. Fig. 2a**),  
710 20:3,200,689 (**Figure 4a**) are located in the middle of homopolymer repeats, which could be  
711 caused by misalignment, 3) X:143,214,235 (**Supp. Fig. 2b**) shows significant strand bias in  
712 Illumina data, and 4) X:140,640,513 (**Supp. Fig. 2d**), X:143,218,136 (**Supp. Fig. 2e**), and  
713 9:113,964,088 (**Supp. Fig. 2f**) are potential heterozygous variants but with allele frequency  
714 notably deviated from 0.5. Two examples are because of the difference in representation -  
715 13:104,270,904 (**Supp. Fig. 2c**) and 10:65,260,789 (**2i**) have other GIAB truth variants in  
716 their 5bp flanking regions. Manually inspecting all the 3,135 variants is beyond the scope of  
717 this paper. However, our analysis suggests SMS technologies, including both PacBio and  
718 ONT, can indeed generate some variants that are not identifiable by short read sequencing.  
719 We advocate for additional efforts to look into these SMS specific candidate variants  
720 systematically. The targets include not only shortlisting truth variants not yet in GIAB, but  
721 also new alignment and variant calling methods and algorithms to avoid detecting spurious  
722 variants in SMS data. Our analysis also serves as another piece of evidence that the GIAB  
723 datasets are of superior quality and are the enabler of machine learning based downstream  
724 applications such as Clairvoyante.  
725

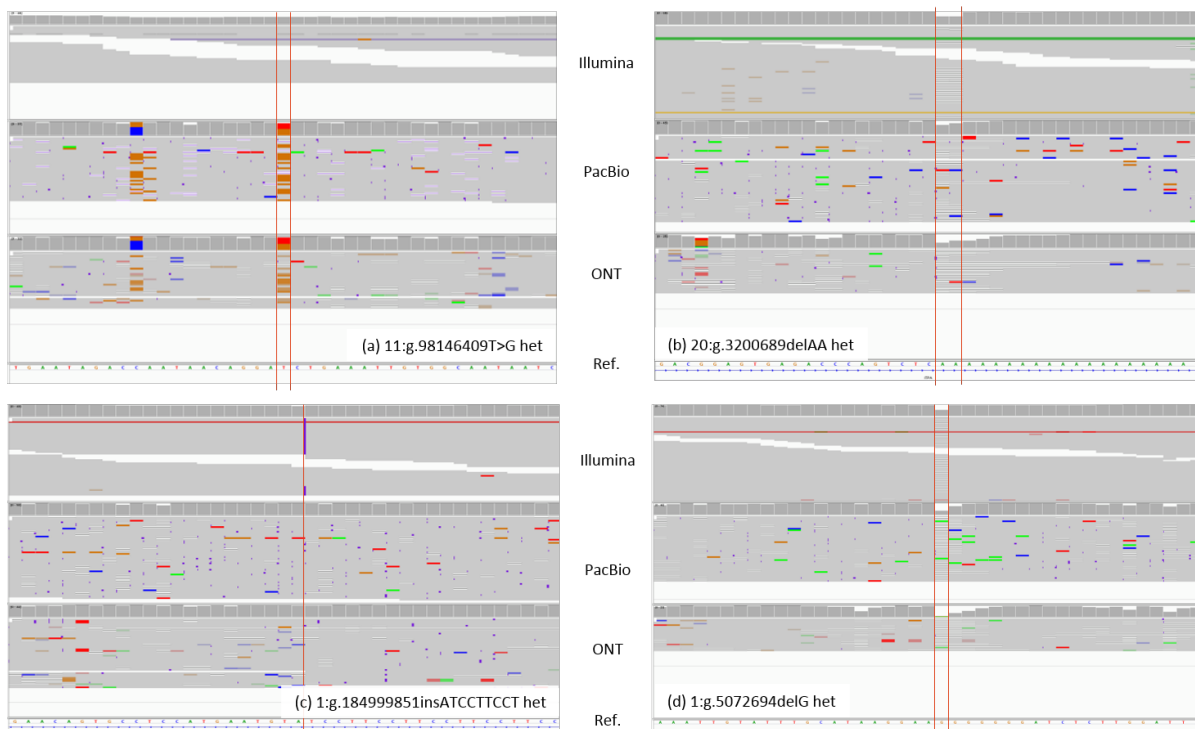

726 **Figure 4.** The IGV screen capture of (a) a heterozygote SNP from T to G at chromosome 11,  
727 position 98,146,409 called only in the PacBio and ONT data, (b) a heterozygote deletion AA  
728 at chromosome 20, position 3,200,689 not called in all three technologies, (c) a heterozygote  
729 insertion ATCCTTCCT at chromosome 1, position 184,999,851 called only in the Illumina  
730 data, and; (d) a heterozygote deletion G at chromosome 1, position 5,072,694 called in all  
731

732 three technologies. The tracks from top to down show the alignments of the Illumina, PacBio,  
733 and ONT reads from HG001 aligned to the human reference GRCh37.

734

735 We also analyzed why the PacBio and ONT technologies cannot detect some variants.

736 **Figure 5** shows the number of known variants undetected by different combinations of  
737 sequencing technologies. We inspected the genome sequence immediately after the variants  
738 and found among the 12,331 variants undetected by all three sequencing technologies, 3,289  
739 (26.67%) are located in homopolymer runs, and 3,632 (29.45%) are located in short tandem  
740 repeats. Among the 178,331 variants that cannot be detected by PacBio and ONT, 102,840  
741 (57.67%) are located in homopolymer runs, and 33,058 (18.54%) are located in short tandem  
742 repeats. For illustration, **Figure 4b to d** depicted b) a known variant in homopolymer runs  
743 undetected by all three sequencing technologies, c) a known variant in short tandem repeats  
744 that cannot be detected PacBio and ONT, and d) a known variant flanked by random  
745 sequenced detected by all three sequencing technologies. It is a known problem that single  
746 molecule sequencing technologies have significantly increased error rates at homopolymer  
747 runs and short tandem repeats<sup>36</sup>. Future improvements to the base-calling algorithm and  
748 sequencing chemistries will lead to raw reads with higher accuracy at these troublesome  
749 genome regions and hence, further decrease the number of known variants undetected by  
750 Clairvoyante.

751

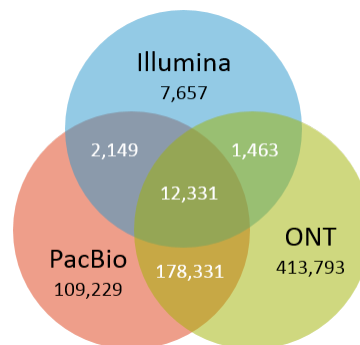

752

753 **Figure 5.** A Venn diagram that shows the number of undetected known variants by different  
754 sequencing technologies or combinations.

755

## 756 Discussion

757 In this paper, we presented Clairvoyante, a multi-task convolutional deep neural network for  
758 variant calling using single molecule sequencing. Its performance is on-par with GATK  
759 UnifiedGenotyper on Illumina data and outperforms Nanopolish and DeepVariant on PacBio  
760 and ONT data. We analyzed the false positive and false negative variant calls in depth and  
761 found complex variants with multiple alternative alleles to be the dominant source of error in  
762 Clairvoyante. We further evaluated several different aspects of Clairvoyante to assess the  
763 quality of the design and how we can further improve its performance by training longer with  
764 lower learning rate, combining multiple samples for training, or improving the input data  
765 quality. Our experiments on using Clairvoyante to call variants genome-wide suggested a  
766 range to search for the best alternative allele cutoff to balance the run time and recall for each  
767 sequencing technology. To the best of our knowledge, Clairvoyante is the first method for  
768 SMS to finish a whole genome variant calling within two hours on a single CPU-only server,  
769 while providing better precision and recall than other state-of-the-art variant callers such as  
770 Nanopolish. A deeper look into the so-called “false positive” variant calls has identified  
771 3,135 variants in HG001 that are not yet in GIAB but detected by both PacBio and ONT

772 independently. Inspecting ten of these variants manually, we identified one strongly  
773 supported variant that should be included by GIAB, seven variants with weak or uncertain  
774 supports that call for additional validation in a future study, and two variants actually exist in  
775 GIAB but with different representation.

776

777 Clairvoyante relies on high-quality training samples to provide accurate and unbiased variant  
778 calling. This hinders Clairvoyante from being applied to completely novel sequencing  
779 technologies and chemistries, for which high-quality sequencing dataset on standard samples  
780 such as GIAB has yet been produced. Nevertheless, with the increasing agreement for  
781 NA12878 as a gold-standard reference, this requirement seems to be quite manageable.  
782 Although Clairvoyante performed well on detecting SNPs, it still has a large room to be  
783 improved in detecting Indels, especially for ONT data, in which the Indel F1-score remains  
784 around 50%. To make the Indel results also practically usable, our target is to improve  
785 Clairvoyante further to reach an Indel F1-score over 80%. The current design of Clairvoyante  
786 ignore variants with two or more alternative alleles. Although the number of variants with  
787 two or more alternative alleles is small, a few thousands of the 3.5M total sites, the design  
788 will be improved in the future to tackle this small but important group of variants. Due to the  
789 rareness of long indel variants for model training, Clairvoyante was set to provide the exact  
790 alternative allele only for indel variants  $\leq 4$ bp. The limitation can be lifted with more high-  
791 quality training samples available. The current Clairvoyante implementation also does not  
792 consider the base quality of the sequencing reads as Clairvoyante was targeting SMS, which  
793 do not have meaningful base quality values to improve the quality of variant calling.  
794 Nevertheless, Clairvoyante can be extended to consider base quality by imposing it as a  
795 weight on depth or add it as an additional tensor to the input. We do not suggest removing  
796 any alignment by their mapping quality because low-quality mappings will be learned by the  
797 Clairvoyante model to be unreliable. This provides valuable information about the  
798 trustworthiness of certain genomic regions. In future work, we plan to extend Clairvoyante to  
799 support somatic variant calling and trio-sample based variant calling. Based on GIAB's high  
800 confidence region lists for variant calling, we also plan on making PacBio-specific, and  
801 ONT-specific high confidence region lists by further investigating the false positive and false  
802 negative variant calls made by Clairvoyante on the two technologies.

803

## 804 Acknowledgments

805 We thank Heng Li and the two anonymous reviewers for their constructive reviews and  
806 suggestions. We thank Guangyu Yang for adding code to Clairvoyante to enable visualization  
807 using TensorBoard. We thank Chi-Man Liu and Yifan Zhang for benchmarking Nanopolish.  
808 R.L. was supported by the General Research Fund No. 27204518, HKSAR. R. L. and T. L.  
809 were partially supported by Innovative and Technology Fund ITS/331/17FP from the  
810 Innovation and Technology Commission, HKSAR. This work was also supported, in part, by  
811 awards from the National Science Foundation (DBI-1350041) and the National Institutes of  
812 Health (R01-HG006677 and UM1-HG008898).

813

## 814 Author Contributions

815 R.L. and M.S. conceived the study. All authors analyzed the data and wrote the manuscript.

816

## 817 References

- 818 1 Goodwin, S., McPherson, J. D. & McCombie, W. R. Coming of age: ten years of  
819 next-generation sequencing technologies. *Nat Rev Genet* **17**, 333-351,  
820 doi:10.1038/nrg.2016.49 (2016).
- 821 2 Nakamura, K. *et al.* Sequence-specific error profile of Illumina sequencers. *Nucleic*  
822 *Acids Res* **39**, e90, doi:10.1093/nar/gkr344 (2011).
- 823 3 Hatem, A., Bozdag, D., Toland, A. E. & Catalyurek, U. V. Benchmarking short  
824 sequence mapping tools. *BMC Bioinformatics* **14**, 184, doi:10.1186/1471-2105-14-  
825 184 (2013).
- 826 4 Li, H. Toward better understanding of artifacts in variant calling from high-coverage  
827 samples. *Bioinformatics* **30**, 2843-2851, doi:10.1093/bioinformatics/btu356 (2014).
- 828 5 Luo, R., Schatz, M. C. & Salzberg, S. L. 16GT: a fast and sensitive variant caller  
829 using a 16-genotype probabilistic model. *GigaScience* (2017).
- 830 6 Van der Auwera, G. A. *et al.* From FastQ data to high confidence variant calls: the  
831 Genome Analysis Toolkit best practices pipeline. *Curr Protoc Bioinformatics* **43**, 11  
832 10 11-33, doi:10.1002/0471250953.bi1110s43 (2013).
- 833 7 Sedlazeck, F. J., Lee, H., Darby, C. A. & Schatz, M. C. Piercing the dark matter:  
834 bioinformatics of long-range sequencing and mapping. *Nat Rev Genet*,  
835 doi:10.1038/s41576-018-0003-4 (2018).
- 836 8 LeCun, Y. The MNIST database of handwritten digits.  
837 <http://yann.lecun.com/exdb/mnist/> (1999).
- 838 9 Szegedy, C., Vanhoucke, V., Ioffe, S., Shlens, J. & Wojna, Z. in *Proceedings of the*  
839 *IEEE Conference on Computer Vision and Pattern Recognition*. 2818-2826.
- 840 10 Poplin, R. *et al.* A universal SNP and small-indel variant caller using deep neural  
841 networks. *Nature Biotechnology* **2018/09/24/online**, doi:10.1038/nbt.4235 (2018).
- 842 11 Zook, J. M. *et al.* Integrating human sequence data sets provides a resource of  
843 benchmark SNP and indel genotype calls. *Nat Biotechnol* **32**, 246-251,  
844 doi:10.1038/nbt.2835 (2014).
- 845 12 Zook, J. M. *et al.* Extensive sequencing of seven human genomes to characterize  
846 benchmark reference materials. *Sci Data* **3**, 160025, doi:10.1038/sdata.2016.25  
847 (2016).
- 848 13 Sedlazeck, F. *et al.* Accurate detection of complex structural variations using single-  
849 molecule sequencing. *Nat Methods* **15**, 461-468 (2018).
- 850 14 Jain, M. *et al.* Nanopore sequencing and assembly of a human genome with ultra-long  
851 reads. *Nat Biotechnol* **36**, 338-345, doi:10.1038/nbt.4060 (2018).
- 852 15 Chin, J. *Simple Convolutional Neural Network for Genomic Variant Calling with*  
853 *TensorFlow*, <[https://towardsdatascience.com/simple-convolution-neural-network-](https://towardsdatascience.com/simple-convolution-neural-network-for-genomic-variant-calling-with-tensorflow-c085dbc2026f)  
854 [for-genomic-variant-calling-with-tensorflow-c085dbc2026f](https://towardsdatascience.com/simple-convolution-neural-network-for-genomic-variant-calling-with-tensorflow-c085dbc2026f)> (2017).
- 855 16 Abadi, M. *et al.* Tensorflow: Large-scale machine learning on heterogeneous  
856 distributed systems. *arXiv preprint arXiv:1603.04467* (2016).
- 857 17 He, K., Zhang, X., Ren, S. & Sun, J. in *Proceedings of the 2015 IEEE International*  
858 *Conference on Computer Vision (ICCV)* 1026-1034 (IEEE Computer Society,  
859 2015).
- 860 18 Klambauer, G., Unterthiner, T., Mayr, A. & Hochreiter, S. Self-Normalizing Neural  
861 Networks. *arXiv preprint arXiv:1706.02515* (2017).
- 862 19 Kingma, D. & Ba, J. Adam: A method for stochastic optimization. *arXiv preprint*  
863 *arXiv:1412.6980* (2014).

- 864 20 Hinton, G. E., Srivastava, N., Krizhevsky, A., Sutskever, I. & Salakhutdinov, R. R.  
865 Improving neural networks by preventing co-adaptation of feature detectors. *arXiv*  
866 *preprint arXiv:1207.0580* (2012).
- 867 21 Cortes, C., Mohri, M. & Rostamizadeh, A. in *Proceedings of the Twenty-Fifth*  
868 *Conference on Uncertainty in Artificial Intelligence*. 109-116 (AUAI Press).
- 869 22 Rigo, A. *et al.* Pypy, <<https://pypy.org/>> (2018).
- 870 23 Alted, F. *Blosc: A blocking, shuffling and lossless compression library*,  
871 <<http://blosc.org/>> (2018).
- 872 24 Biosciences, P. *Genomic Consensus*,  
873 <<https://github.com/PacificBiosciences/GenomicConsensus>> (2018).
- 874 25 Loman, N. J., Quick, J. & Simpson, J. T. A complete bacterial genome assembled de  
875 novo using only nanopore sequencing data. *Nature methods* **12**, 733 (2015).
- 876 26 Leija-Salazar, M. *et al.* Detection of GBA missense mutations and other variants  
877 using the Oxford Nanopore MinION. *bioRxiv*, 288068 (2018).
- 878 27 Cleary, J. G. *et al.* Joint variant and de novo mutation identification on pedigrees from  
879 high-throughput sequencing data. *J Comput Biol* **21**, 405-419,  
880 doi:10.1089/cmb.2014.0029 (2014).
- 881 28 Luo, R., Lam, T.-W. & Schatz, M. Skyhawk: An Artificial Neural Network-based  
882 discriminator for reviewing clinically significant genomic variants. *bioRxiv*, 311985  
883 (2018).
- 884 29 Sandmann, S. *et al.* Evaluating variant calling tools for non-matched next-generation  
885 sequencing data. *Scientific reports* **7**, 43169 (2017).
- 886 30 Lai, Z. *et al.* VarDict: a novel and versatile variant caller for next-generation  
887 sequencing in cancer research. *Nucleic acids research* **44**, e108-e108 (2016).
- 888 31 Wilm, A. *et al.* LoFreq: a sequence-quality aware, ultra-sensitive variant caller for  
889 uncovering cell-population heterogeneity from high-throughput sequencing datasets.  
890 *Nucleic acids research* **40**, 11189-11201 (2012).
- 891 32 Garrison, E. & Marth, G. Haplotype-based variant detection from short-read  
892 sequencing. *arXiv preprint arXiv:1207.3907* (2012).
- 893 33 Li, H. Improving SNP discovery by base alignment quality. *Bioinformatics* **27**, 1157-  
894 1158, doi:10.1093/bioinformatics/btr076 (2011).
- 895 34 Li, H. *et al.* A synthetic-diploid benchmark for accurate variant-calling evaluation.  
896 *Nature methods* **15**, 595 (2018).
- 897 35 Robinson, J. T., Thorvaldsdottir, H., Wenger, A. M., Zehir, A. & Mesirov, J. P.  
898 Variant Review with the Integrative Genomics Viewer. *Cancer Res* **77**, e31-e34,  
899 doi:10.1158/0008-5472.CAN-17-0337 (2017).
- 900 36 Lu, H., Giordano, F. & Ning, Z. Oxford Nanopore MinION sequencing and genome  
901 assembly. *Genomics, proteomics & bioinformatics* **14**, 265-279 (2016).  
902
